# Supplementary material for: RNA-Seq Reveals miRNA Role Shifts in Seven Stages of Skeletal Muscles in Goat Fetuses and Kids
Source: Front Genet. 2020 Jul 7;11:684. doi: 10.3389/fgene.2020.00684 (PMC7358459; doi:10.3389/fgene.2020.00684)
Supplement: TABLE S10 — The GO terms enrichment of profile 19. [file Table_10.XLSX]

## Sheet: Sheet1
The GO terms enrichment of profile 19.
GO_accession	Description	Term_type	Over_represented_pValue	DEG_item	DEG_list	Bg_item	Bg_list	Gene_names
GO:0003333	amino acid transmembrane transport	biological_process	0.0007653	6	287	74	20542	102180391,108635491,102191076,102173224,102177558,102168759
GO:1903825	organic acid transmembrane transport	biological_process	0.0008899	6	287	76	20542	102180391,108635491,102173224,102191076,102177558,102168759
GO:0098656	anion transmembrane transport	biological_process	0.001019	6	287	78	20542	102180391,108635491,102173224,102191076,102177558,102168759
GO:0006865	amino acid transport	biological_process	0.0010777	6	287	79	20542	102177558,102168759,102180391,108635491,102191076,102173224
GO:0015849	organic acid transport	biological_process	0.0028686	7	287	128	20542	102191076,102173224,102180391,108635491,102185309,102168759,102177558
GO:0046942	carboxylic acid transport	biological_process	0.0028686	7	287	128	20542	108635491,102180391,102173224,102191076,102177558,102185309,102168759
GO:0015711	organic anion transport	biological_process	0.0030052	7	287	129	20542	102177558,102168759,102185309,102180391,108635491,102191076,102173224
GO:0015171	amino acid transmembrane transporter activity	molecular_function	0.0041107	5	287	72	20542	102168759,108635491,102180391,102191076,102173224
GO:0004749	ribose phosphate diphosphokinase activity	molecular_function	0.0066911	2	287	10	20542	102180994,108637349
GO:0042277	peptide binding	molecular_function	0.0084903	2	287	10	20542	102187638,102181690
GO:0006820	anion transport	biological_process	0.01019	8	287	201	20542	102173224,102180391,108635491,100750232,102168759,102185309,102177558,102191076
GO:0008716	D-alanine-D-alanine ligase activity	molecular_function	0.010246	2	287	10	20542	102178200,102179779
GO:0051235	maintenance of location	biological_process	0.010373	4	287	58	20542	102172287,102171485,108636774,102187638
GO:0005342	organic acid transmembrane transporter activity	molecular_function	0.011499	5	287	91	20542	108635491,102180391,102191076,102173224,102168759
GO:0046943	carboxylic acid transmembrane transporter activity	molecular_function	0.011499	5	287	91	20542	102180391,108635491,102191076,102173224,102168759
GO:0006119	oxidative phosphorylation	biological_process	0.011843	3	287	36	20542	102191831,106504013,102189372
GO:0042773	ATP synthesis coupled electron transport	biological_process	0.011843	3	287	36	20542	106504013,102189372,102191831
GO:0016778	diphosphotransferase activity	molecular_function	0.012145	2	287	13	20542	102180994,108637349
GO:0008514	organic anion transmembrane transporter activity	molecular_function	0.014414	5	287	96	20542	102191076,102173224,108635491,102180391,102168759
GO:0009291	unidirectional conjugation	biological_process	0.015582	1	287	1	20542	102172470
GO:0001000	bacterial-type RNA polymerase core enzyme binding	molecular_function	0.01576	1	287	1	20542	102170196
GO:0043175	RNA polymerase core enzyme binding	molecular_function	0.01576	1	287	1	20542	102170196
GO:0070063	RNA polymerase binding	molecular_function	0.01576	1	287	1	20542	102170196
GO:0008771	[citrate (pro-3S)-lyase] ligase activity	molecular_function	0.01576	1	287	1	20542	102184459
GO:0050215	propanediol dehydratase activity	molecular_function	0.01576	1	287	1	20542	102174606
GO:0032507	maintenance of protein location in cell	biological_process	0.016644	3	287	37	20542	108636774,102171485,102187638
GO:0045185	maintenance of protein location	biological_process	0.016644	3	287	37	20542	102187638,102171485,108636774
GO:0051651	maintenance of location in cell	biological_process	0.016644	3	287	37	20542	102171485,108636774,102187638
GO:0033218	amide binding	molecular_function	0.01882	2	287	15	20542	102181690,102187638
GO:0071705	nitrogen compound transport	biological_process	0.020868	7	287	183	20542	102186482,102168759,102177558,102173224,102191076,102180391,108635491
GO:0008509	anion transmembrane transporter activity	molecular_function	0.021913	6	287	145	20542	102168759,102191076,102173224,100750232,102180391,108635491
GO:0016799	hydrolase activity, hydrolyzing N-glycosyl compounds	molecular_function	0.025185	2	287	17	20542	102172881,102175908
GO:0004549	tRNA-specific ribonuclease activity	molecular_function	0.026348	2	287	17	20542	102174830,102169786
GO:0050518	2-C-methyl-D-erythritol 4-phosphate cytidylyltransferase activity	molecular_function	0.026714	1	287	2	20542	102178496
GO:0022904	respiratory electron transport chain	biological_process	0.028835	3	287	49	20542	102191831,102189372,106504013
GO:0003919	FMN adenylyltransferase activity	molecular_function	0.03029	1	287	2	20542	102172052
GO:0017046	peptide hormone binding	molecular_function	0.031224	1	287	2	20542	102181690
GO:0042562	hormone binding	molecular_function	0.031224	1	287	2	20542	102181690
GO:0051424	corticotropin-releasing hormone binding	molecular_function	0.031224	1	287	2	20542	102181690
GO:0008137	NADH dehydrogenase (ubiquinone) activity	molecular_function	0.03129	3	287	47	20542	102191831,102189372,106504013
GO:0050136	NADH dehydrogenase (quinone) activity	molecular_function	0.03129	3	287	47	20542	102191831,102189372,106504013
GO:0045333	cellular respiration	biological_process	0.033888	4	287	87	20542	106504013,102189372,102189681,102191831
GO:0003954	NADH dehydrogenase activity	molecular_function	0.039099	3	287	51	20542	106504013,102189372,102191831
GO:0016433	rRNA (adenine) methyltransferase activity	molecular_function	0.040959	1	287	3	20542	102187196
GO:0007156	homophilic cell adhesion via plasma membrane adhesion molecules	biological_process	0.04449	4	287	90	20542	102189372,102182980,108636357,102169849
GO:0009653	anatomical structure morphogenesis	biological_process	0.045434	7	287	223	20542	102173394,102172234,108637147,102174835,102172052,106502552,102181244
GO:0015980	energy derivation by oxidation of organic compounds	biological_process	0.045905	4	287	95	20542	102189681,102189372,106504013,102191831
GO:0008140	cAMP response element binding protein binding	molecular_function	0.046291	1	287	3	20542	102180907
GO:0051289	protein homotetramerization	biological_process	0.046291	1	287	3	20542	102180907
GO:0030021	extracellular matrix structural constituent conferring compression resistance	molecular_function	0.046322	1	287	3	20542	102172052
GO:0030345	structural constituent of tooth enamel	molecular_function	0.046322	1	287	3	20542	102172052
GO:0016743	carboxyl- or carbamoyltransferase activity	molecular_function	0.046541	1	287	3	20542	102179779
GO:0016730	oxidoreductase activity, acting on iron-sulfur proteins as donors	molecular_function	0.046541	1	287	3	20542	102174606
GO:0003953	NAD+ nucleosidase activity	molecular_function	0.046541	1	287	3	20542	102172881
GO:0016878	acid-thiol ligase activity	molecular_function	0.046541	1	287	3	20542	102184459
GO:0007010	cytoskeleton organization	biological_process	0.046879	13	287	523	20542	102169433,108636774,102186276,106502661,102169933,102177456,102182015,102178163,102191317,108637113,102184459,100860761,102179716
GO:0007015	actin filament organization	biological_process	0.048527	3	287	63	20542	102177456,102169933,102169433
GO:0051220	cytoplasmic sequestering of protein	biological_process	0.048589	2	287	24	20542	102171485,102187638
GO:0001501	skeletal system development	biological_process	0.051758	1	287	4	20542	102179783
GO:0002062	chondrocyte differentiation	biological_process	0.051758	1	287	4	20542	102179783
GO:0035988	chondrocyte proliferation	biological_process	0.051758	1	287	4	20542	102179783
GO:0051216	cartilage development	biological_process	0.051758	1	287	4	20542	102179783
GO:0061448	connective tissue development	biological_process	0.051758	1	287	4	20542	102179783
GO:0005216	ion channel activity	molecular_function	0.051968	12	287	469	20542	102178936,102173685,102179783,100750232,102185309,102179313,100861026,102186504,100861292,102186512,102189772,102186276
GO:0022838	substrate-specific channel activity	molecular_function	0.051968	12	287	469	20542	100750232,102179783,102178936,102173685,102186504,100861026,102179313,102185309,102186276,102189772,102186512,100861292
GO:0015267	channel activity	molecular_function	0.053743	12	287	472	20542	100861292,102186512,102189772,102186276,102185309,102179313,100861026,102186504,102178936,102173685,102179783,100750232
GO:0022803	passive transmembrane transporter activity	molecular_function	0.053743	12	287	472	20542	102178936,102173685,102179783,100750232,102185309,102179313,100861026,102186504,100861292,102186512,102189772,102186276
GO:0000213	tRNA-intron endonuclease activity	molecular_function	0.058796	1	287	4	20542	102174830
GO:0070972	protein localization to endoplasmic reticulum	biological_process	0.059158	3	287	61	20542	102189849,102187638,102187396
GO:0009292	genetic transfer	biological_process	0.060712	1	287	4	20542	102172470
GO:0005840	ribosome	cellular_component	0.060807	15	287	828	20542	106503454,102177425,102173281,102188426,102173754,102176501,106503606,102180885,102185100,106502612,102183123,102181246,102187701,102174549,102185309
GO:0009887	organ morphogenesis	biological_process	0.061354	1	287	4	20542	102172052
GO:0042475	odontogenesis of dentin-containing tooth	biological_process	0.061354	1	287	4	20542	102172052
GO:0042476	odontogenesis	biological_process	0.061354	1	287	4	20542	102172052
GO:0008241	peptidyl-dipeptidase activity	molecular_function	0.061376	1	287	4	20542	102171917
GO:0048513	organ development	biological_process	0.062454	2	287	30	20542	102179783,102172052
GO:0016655	oxidoreductase activity, acting on NAD(P)H, quinone or similar compound as acceptor	molecular_function	0.062748	3	287	62	20542	102191831,102189372,106504013
GO:0098742	cell-cell adhesion via plasma-membrane adhesion molecules	biological_process	0.063215	4	287	101	20542	108636357,102169849,102182980,102189372
GO:0005509	calcium ion binding	molecular_function	0.064301	13	287	541	20542	102190639,102178163,108636357,102173630,102172910,102182980,102169849,102178363,102189774,102169825,102175068,102189372,102191474
GO:0005938	cell cortex	cellular_component	0.066539	4	287	101	20542	102172616,102171485,102178163,106502661
GO:0001671	ATPase activator activity	molecular_function	0.069363	1	287	5	20542	102170793
GO:0008924	malate dehydrogenase (quinone) activity	molecular_function	0.075695	1	287	5	20542	102189681
GO:0003905	alkylbase DNA N-glycosylase activity	molecular_function	0.076139	1	287	5	20542	102175908
GO:0032269	negative regulation of cellular protein metabolic process	biological_process	0.078482	3	287	68	20542	102191313,102173992,102170846
GO:0051248	negative regulation of protein metabolic process	biological_process	0.078482	3	287	68	20542	102170846,102191313,102173992
GO:0098609	cell-cell adhesion	biological_process	0.07882	4	287	110	20542	102182980,102189372,108636357,102169849
GO:0004866	endopeptidase inhibitor activity	molecular_function	0.079227	4	287	110	20542	102178021,102168282,102171106,102172450
GO:0061135	endopeptidase regulator activity	molecular_function	0.079227	4	287	110	20542	102178021,102171106,102168282,102172450
GO:0006621	protein retention in ER lumen	biological_process	0.080761	1	287	6	20542	102187638
GO:0035437	maintenance of protein localization in endoplasmic reticulum	biological_process	0.080761	1	287	6	20542	102187638
GO:0046923	ER retention sequence binding	molecular_function	0.080761	1	287	6	20542	102187638
GO:0072595	maintenance of protein localization in organelle	biological_process	0.080761	1	287	6	20542	102187638
GO:0006412	translation	biological_process	0.081958	17	287	976	20542	106503606,102180885,102174367,102173281,102177425,106503454,102185309,102191313,102183123,102185100,102188426,102176501,102178168,102174549,102187701,102181246,106502612
GO:0030154	cell differentiation	biological_process	0.082499	6	287	208	20542	106502552,102179783,102181244,102172234,108637147,102174835
GO:0000921	septin ring assembly	biological_process	0.082533	2	287	32	20542	102178163,106502661
GO:0005940	septin ring	cellular_component	0.082533	2	287	32	20542	102178163,106502661
GO:0031106	septin ring organization	biological_process	0.082533	2	287	32	20542	106502661,102178163
GO:0032156	septin cytoskeleton	cellular_component	0.082533	2	287	32	20542	102178163,106502661
GO:0032185	septin cytoskeleton organization	biological_process	0.082533	2	287	32	20542	102178163,106502661
GO:0009399	nitrogen fixation	biological_process	0.085602	1	287	7	20542	102168955
GO:0008283	cell proliferation	biological_process	0.0857	2	287	33	20542	102172287,102179783
GO:0009888	tissue development	biological_process	0.087122	4	287	120	20542	102174835,102179783,102181244,106502552
GO:0016715	oxidoreductase activity, acting on paired donors, with incorporation or reduction of molecular oxygen, reduced ascorbate as one donor, and incorporation of one atom of oxygen	molecular_function	0.08736	1	287	6	20542	102179682
GO:0002064	epithelial cell development	biological_process	0.089562	3	287	73	20542	106502552,102181244,102174835
GO:0002065	columnar/cuboidal epithelial cell differentiation	biological_process	0.089562	3	287	73	20542	106502552,102181244,102174835
GO:0002066	columnar/cuboidal epithelial cell development	biological_process	0.089562	3	287	73	20542	106502552,102181244,102174835
GO:0005213	structural constituent of chorion	molecular_function	0.089562	3	287	73	20542	102174835,102181244,106502552
GO:0007292	female gamete generation	biological_process	0.089562	3	287	73	20542	102174835,106502552,102181244
GO:0007304	chorion-containing eggshell formation	biological_process	0.089562	3	287	73	20542	102181244,106502552,102174835
GO:0030703	eggshell formation	biological_process	0.089562	3	287	73	20542	102181244,106502552,102174835
GO:0030707	ovarian follicle cell development	biological_process	0.089562	3	287	73	20542	102174835,102181244,106502552
GO:0048477	oogenesis	biological_process	0.089562	3	287	73	20542	102174835,102181244,106502552
GO:0048646	anatomical structure formation involved in morphogenesis	biological_process	0.091499	4	287	116	20542	102181244,106502552,102174835,108637147
GO:0048869	cellular developmental process	biological_process	0.094579	7	287	268	20542	102172234,102173394,102174835,108637147,102179783,102181244,106502552
GO:0043043	peptide biosynthetic process	biological_process	0.094585	17	287	993	20542	102181246,106502612,102187701,102174549,102185100,102188426,102176501,102178168,102185309,102183123,102191313,106503606,102180885,102177425,106503454,102174367,102173281
GO:0070567	cytidylyltransferase activity	molecular_function	0.094682	1	287	7	20542	102178496
GO:0003735	structural constituent of ribosome	molecular_function	0.095968	14	287	818	20542	102187701,102174549,106502612,102183123,102181246,102185309,102173281,106503454,102177425,102188426,102176501,102180885,106503606,102185100
GO:0043938	positive regulation of sporulation	biological_process	0.096394	1	287	7	20542	108637147
GO:0045597	positive regulation of cell differentiation	biological_process	0.096394	1	287	7	20542	108637147
GO:0045881	positive regulation of sporulation resulting in formation of a cellular spore	biological_process	0.096394	1	287	7	20542	108637147
GO:0043154	negative regulation of cysteine-type endopeptidase activity involved in apoptotic process	biological_process	0.096994	1	287	7	20542	102173992
GO:2000117	negative regulation of cysteine-type endopeptidase activity	biological_process	0.096994	1	287	7	20542	102173992
GO:0048856	anatomical structure development	biological_process	0.097367	8	287	326	20542	108637147,102174835,102179783,102172052,102172234,102173394,106502552,102181244
GO:0030855	epithelial cell differentiation	biological_process	0.097678	3	287	76	20542	102181244,106502552,102174835
GO:0005539	glycosaminoglycan binding	molecular_function	0.10039	2	287	35	20542	100860957,102172105
GO:0042176	regulation of protein catabolic process	biological_process	0.1023	2	287	38	20542	102172653,102170846
GO:0016881	acid-amino acid ligase activity	molecular_function	0.1024	2	287	36	20542	102178200,102179779
GO:0006879	cellular iron ion homeostasis	biological_process	0.10287	2	287	50	20542	108633376,108633422
GO:0055072	iron ion homeostasis	biological_process	0.10287	2	287	50	20542	108633376,108633422
GO:0030212	hyaluronan metabolic process	biological_process	0.10312	1	287	7	20542	102178021
GO:1903510	mucopolysaccharide metabolic process	biological_process	0.10312	1	287	7	20542	102178021
GO:0006771	riboflavin metabolic process	biological_process	0.10319	1	287	7	20542	102172052
GO:0009231	riboflavin biosynthetic process	biological_process	0.10319	1	287	7	20542	102172052
GO:0042726	flavin-containing compound metabolic process	biological_process	0.10319	1	287	7	20542	102172052
GO:0042727	flavin-containing compound biosynthetic process	biological_process	0.10319	1	287	7	20542	102172052
GO:0016929	SUMO-specific protease activity	molecular_function	0.10498	2	287	46	20542	102181634,102168955
GO:0032183	SUMO binding	molecular_function	0.10498	2	287	46	20542	102168955,102181634
GO:0070122	isopeptidase activity	molecular_function	0.10498	2	287	46	20542	102168955,102181634
GO:0070138	ubiquitin-like protein-specific isopeptidase activity	molecular_function	0.10498	2	287	46	20542	102168955,102181634
GO:0070140	SUMO-specific isopeptidase activity	molecular_function	0.10498	2	287	46	20542	102181634,102168955
GO:0005543	phospholipid binding	molecular_function	0.1055	4	287	119	20542	102180522,102171485,102181071,102176556
GO:0005048	signal sequence binding	molecular_function	0.10616	1	287	8	20542	102187638
GO:0007281	germ cell development	biological_process	0.10662	3	287	79	20542	106502552,102181244,102174835
GO:0009975	cyclase activity	molecular_function	0.10679	2	287	36	20542	108634151,102185858
GO:0016892	endoribonuclease activity, producing 3'-phosphomonoesters	molecular_function	0.1068	1	287	8	20542	102174830
GO:0033743	peptide-methionine (R)-S-oxide reductase activity	molecular_function	0.10762	1	287	8	20542	102182653
GO:0046916	cellular transition metal ion homeostasis	biological_process	0.10789	2	287	51	20542	108633422,108633376
GO:0042173	regulation of sporulation resulting in formation of a cellular spore	biological_process	0.10979	1	287	8	20542	108637147
GO:0043937	regulation of sporulation	biological_process	0.10979	1	287	8	20542	108637147
GO:0022900	electron transport chain	biological_process	0.10992	3	287	82	20542	106504013,102189372,102191831
GO:0017089	glycolipid transporter activity	molecular_function	0.11023	1	287	8	20542	102188823
GO:0046836	glycolipid transport	biological_process	0.11023	1	287	8	20542	102188823
GO:0004789	thiamine-phosphate diphosphorylase activity	molecular_function	0.1112	1	287	8	20542	102178861
GO:0019104	DNA N-glycosylase activity	molecular_function	0.11601	1	287	8	20542	102175908
GO:0043604	amide biosynthetic process	biological_process	0.1168	17	287	1019	20542	102180885,106503606,102174367,102173281,102177425,106503454,102185309,102191313,102183123,102185100,102176501,102188426,102178168,102174549,102187701,102181246,106502612
GO:0006518	peptide metabolic process	biological_process	0.11762	17	287	1021	20542	102181246,106502612,102187701,102174549,102185100,102176501,102188426,102178168,102185309,102183123,102191313,106503606,102180885,102177425,106503454,102174367,102173281
GO:0051246	regulation of protein metabolic process	biological_process	0.11792	4	287	128	20542	102172653,102173992,102191313,102170846
GO:0016615	malate dehydrogenase activity	molecular_function	0.11872	1	287	8	20542	102189681
GO:0008199	ferric iron binding	molecular_function	0.11912	2	287	53	20542	108633422,108633376
GO:0008290	F-actin capping protein complex	cellular_component	0.11942	1	287	10	20542	102169433
GO:0000394	RNA splicing, via endonucleolytic cleavage and ligation	biological_process	0.12101	1	287	9	20542	102174830
GO:0006388	tRNA splicing, via endonucleolytic cleavage and ligation	biological_process	0.12101	1	287	9	20542	102174830
GO:0055076	transition metal ion homeostasis	biological_process	0.12116	2	287	54	20542	108633422,108633376
GO:0003989	acetyl-CoA carboxylase activity	molecular_function	0.126	1	287	9	20542	102178200
GO:0016421	CoA carboxylase activity	molecular_function	0.126	1	287	9	20542	102178200
GO:0016885	ligase activity, forming carbon-carbon bonds	molecular_function	0.126	1	287	9	20542	102178200
GO:0009847	spore germination	biological_process	0.12689	1	287	10	20542	102177558
GO:0030029	actin filament-based process	biological_process	0.12767	3	287	90	20542	102169433,102169933,102177456
GO:0030036	actin cytoskeleton organization	biological_process	0.12767	3	287	90	20542	102169933,102169433,102177456
GO:0030178	negative regulation of Wnt signaling pathway	biological_process	0.12787	1	287	9	20542	102183492
GO:0070403	NAD+ binding	molecular_function	0.12908	1	287	9	20542	102181151
GO:0044448	cell cortex part	cellular_component	0.13011	3	287	83	20542	106502661,102178163,102172616
GO:0005737	cytoplasm	cellular_component	0.1302	41	287	2517	20542	102178640,102188324,106503454,102190985,102187922,102177296,106503606,102191313,102173962,102185858,102169825,102173394,102191831,102188823,102174369,102176501,102187701,102174549,102189849,106502612,108637376,102181246,102184374,102179863,102173281,102178163,102177425,102180885,106502661,108633345,102171485,102173992,102183123,102185309,102181899,102172616,102188426,102173754,102185100,102180611…
GO:0048468	cell development	biological_process	0.13212	4	287	134	20542	102174835,102172234,102181244,106502552
GO:0005247	voltage-gated chloride channel activity	molecular_function	0.13324	1	287	9	20542	100750232
GO:0005253	anion channel activity	molecular_function	0.13324	1	287	9	20542	100750232
GO:0005254	chloride channel activity	molecular_function	0.13324	1	287	9	20542	100750232
GO:0008308	voltage-gated anion channel activity	molecular_function	0.13324	1	287	9	20542	100750232
GO:0015108	chloride transmembrane transporter activity	molecular_function	0.13324	1	287	9	20542	100750232
GO:0003785	actin monomer binding	molecular_function	0.13362	1	287	14	20542	102177456
GO:0009116	nucleoside metabolic process	biological_process	0.13365	6	287	246	20542	102189372,106504013,102191831,108637349,102180994,102191313
GO:1901564	organonitrogen compound metabolic process	biological_process	0.13508	30	287	1847	20542	102178021,102185309,102191313,102182991,102183123,102185858,102179779,106504013,102189681,102180885,106503606,102173281,102174367,106503454,102177425,102189372,102187396,102174549,102187701,106502612,102171985,102181246,102176501,102188426,102185100,102180994,102191831,108637349,102178168,102172052
GO:0006446	regulation of translational initiation	biological_process	0.13518	1	287	10	20542	102191313
GO:0008190	eukaryotic initiation factor 4E binding	molecular_function	0.13518	1	287	10	20542	102191313
GO:0045947	negative regulation of translational initiation	biological_process	0.13518	1	287	10	20542	102191313
GO:1901657	glycosyl compound metabolic process	biological_process	0.13777	6	287	248	20542	102191831,108637349,102180994,102191313,106504013,102189372
GO:0051861	glycolipid binding	molecular_function	0.13807	1	287	10	20542	102188823
GO:0048731	system development	biological_process	0.13904	3	287	90	20542	102172234,102179783,102172052
GO:0016849	phosphorus-oxygen lyase activity	molecular_function	0.13934	2	287	43	20542	102185858,108634151
GO:0045861	negative regulation of proteolysis	biological_process	0.13975	2	287	45	20542	102170846,102173992
GO:0030151	molybdenum ion binding	molecular_function	0.14019	1	287	10	20542	102168955
GO:0016901	oxidoreductase activity, acting on the CH-OH group of donors, quinone or similar compound as acceptor	molecular_function	0.141	1	287	10	20542	102189681
GO:0003779	actin binding	molecular_function	0.14391	8	287	346	20542	108637113,102191317,100860761,102184459,102179716,102177456,102182015,102186276
GO:0016894	endonuclease activity, active with either ribo- or deoxyribonucleic acids and producing 3'-phosphomonoesters	molecular_function	0.14447	1	287	11	20542	102174830
GO:0007205	protein kinase C-activating G-protein coupled receptor signaling pathway	biological_process	0.14494	1	287	10	20542	102171485
GO:1901264	carbohydrate derivative transport	biological_process	0.14506	1	287	11	20542	102188823
GO:0005578	proteinaceous extracellular matrix	cellular_component	0.14526	4	287	135	20542	102191474,102189774,102178363,102190639
GO:0070009	serine-type aminopeptidase activity	molecular_function	0.14649	1	287	11	20542	102183492
GO:0006171	cAMP biosynthetic process	biological_process	0.14678	1	287	10	20542	102185858
GO:0046058	cAMP metabolic process	biological_process	0.14678	1	287	10	20542	102185858
GO:0005743	mitochondrial inner membrane	cellular_component	0.14724	4	287	152	20542	102185309,102180611,102191313,102191831
GO:0006848	pyruvate transport	biological_process	0.14773	1	287	12	20542	102185309
GO:0006850	mitochondrial pyruvate transport	biological_process	0.14773	1	287	12	20542	102185309
GO:0042287	MHC protein binding	molecular_function	0.14928	1	287	11	20542	108635007
GO:0042289	MHC class II protein binding	molecular_function	0.14928	1	287	11	20542	108635007
GO:0022412	cellular process involved in reproduction in multicellular organism	biological_process	0.14932	3	287	94	20542	102174835,106502552,102181244
GO:0050829	defense response to Gram-negative bacterium	biological_process	0.14977	1	287	11	20542	102172616
GO:0005198	structural molecule activity	molecular_function	0.15017	23	287	1417	20542	106503606,102180885,106503454,102177425,102176043,102173281,102178163,102171391,102185309,102183123,106502552,102181244,102188426,102176501,102185100,102174835,102172052,102188410,102181634,106502612,102181246,102187701,102174549
GO:0005770	late endosome	cellular_component	0.15147	1	287	11	20542	102173992
GO:0031902	late endosome membrane	cellular_component	0.15147	1	287	11	20542	102173992
GO:0045121	membrane raft	cellular_component	0.15147	1	287	11	20542	102173992
GO:0071986	Ragulator complex	cellular_component	0.15147	1	287	11	20542	102173992
GO:0006091	generation of precursor metabolites and energy	biological_process	0.15251	5	287	194	20542	102189681,106504013,102189372,102191831,102185858
GO:0005261	cation channel activity	molecular_function	0.15259	6	287	242	20542	102173685,102186276,102189772,102179783,102186504,100861026
GO:0047396	glycosylphosphatidylinositol diacylglycerol-lyase activity	molecular_function	0.15293	1	287	11	20542	108634151
GO:0000184	nuclear-transcribed mRNA catabolic process, nonsense-mediated decay	biological_process	0.15308	1	287	11	20542	102189849
GO:0009894	regulation of catabolic process	biological_process	0.15369	4	287	140	20542	102172653,102171391,102178163,102170846
GO:0071702	organic substance transport	biological_process	0.15404	20	287	1055	20542	108635007,102180391,102173224,102181071,102186276,102173962,102191076,102169825,102177558,102168759,102185309,108635491,102188823,102172470,102189849,102172287,102187396,102186482,102188410,102179863
GO:0005664	nuclear origin of replication recognition complex	cellular_component	0.15419	1	287	11	20542	102175861
GO:0003006	developmental process involved in reproduction	biological_process	0.15497	3	287	95	20542	106502552,102181244,102174835
GO:0004143	diacylglycerol kinase activity	molecular_function	0.15557	1	287	11	20542	102171485
GO:0046849	bone remodeling	biological_process	0.15686	1	287	14	20542	102171106
GO:0048771	tissue remodeling	biological_process	0.15686	1	287	14	20542	102171106
GO:0043161	proteasome-mediated ubiquitin-dependent protein catabolic process	biological_process	0.15757	2	287	48	20542	102170846,102183790
GO:0043603	cellular amide metabolic process	biological_process	0.15935	17	287	1063	20542	102180885,106503606,102177425,106503454,102174367,102173281,102185309,102183123,102191313,102185100,102188426,102176501,102178168,102181246,106502612,102187701,102174549
GO:0004016	adenylate cyclase activity	molecular_function	0.15977	1	287	11	20542	102185858
GO:0008131	primary amine oxidase activity	molecular_function	0.15983	1	287	12	20542	102182991
GO:0006813	potassium ion transport	biological_process	0.15991	4	287	140	20542	102179783,102174895,102186276,102175177
GO:0008239	dipeptidyl-peptidase activity	molecular_function	0.15994	1	287	12	20542	102183492
GO:0060429	epithelium development	biological_process	0.16026	3	287	99	20542	102174835,102181244,106502552
GO:0034220	ion transmembrane transport	biological_process	0.16089	8	287	368	20542	102191076,102177558,102171391,102168759,102180391,108635491,102173224,102168606
GO:0006811	ion transport	biological_process	0.16198	22	287	1187	20542	102186504,102175177,102187396,102186512,102168637,102174895,102189772,100750232,108635491,102179783,102171391,102185309,102168759,102177558,100861026,102191076,100861292,102186276,102168606,102173685,102173224,102180391
GO:0000502	proteasome complex	cellular_component	0.162	2	287	53	20542	102172653,102172616
GO:0042600	chorion	cellular_component	0.16241	3	287	95	20542	102181244,106502552,102174835
GO:0008535	respiratory chain complex IV assembly	biological_process	0.16339	1	287	12	20542	102186482
GO:0033617	mitochondrial respiratory chain complex IV assembly	biological_process	0.16339	1	287	12	20542	102186482
GO:0010498	proteasomal protein catabolic process	biological_process	0.16477	2	287	50	20542	102183790,102170846
GO:0006777	Mo-molybdopterin cofactor biosynthetic process	biological_process	0.16483	1	287	13	20542	102171985
GO:0019720	Mo-molybdopterin cofactor metabolic process	biological_process	0.16483	1	287	13	20542	102171985
GO:0044444	cytoplasmic part	cellular_component	0.16498	32	287	2001	20542	102191831,102176501,102181246,106502612,102174549,102187701,102179863,106503454,102178640,106503606,102185858,102173962,102191313,102173394,102169825,102181899,102185100,102188426,102173754,102172616,102180611,102186482,102177425,102178163,102173281,102180885,102183123,102173992,102171485,108633345,106502661,102185309
GO:0006720	isoprenoid metabolic process	biological_process	0.16833	2	287	50	20542	102178496,102189681
GO:0008299	isoprenoid biosynthetic process	biological_process	0.16833	2	287	50	20542	102178496,102189681
GO:0004511	tyrosine 3-monooxygenase activity	molecular_function	0.16835	1	287	12	20542	102181032
GO:0006541	glutamine metabolic process	biological_process	0.16866	1	287	12	20542	102179779
GO:0006284	base-excision repair	biological_process	0.16942	1	287	12	20542	102175908
GO:0007172	signal complex assembly	biological_process	0.16954	1	287	13	20542	102184810
GO:0031419	cobalamin binding	molecular_function	0.1696	1	287	12	20542	102174606
GO:0016671	oxidoreductase activity, acting on a sulfur group of donors, disulfide as acceptor	molecular_function	0.17048	1	287	13	20542	102182653
GO:0007016	cytoskeletal anchoring at plasma membrane	biological_process	0.17075	1	287	13	20542	108636774
GO:0051016	barbed-end actin filament capping	biological_process	0.1708	1	287	14	20542	102169433
GO:0008252	nucleotidase activity	molecular_function	0.17115	1	287	13	20542	102180885
GO:0008253	5'-nucleotidase activity	molecular_function	0.17115	1	287	13	20542	102180885
GO:0016624	oxidoreductase activity, acting on the aldehyde or oxo group of donors, disulfide as acceptor	molecular_function	0.17169	1	287	14	20542	102182852
GO:0009117	nucleotide metabolic process	biological_process	0.17304	7	287	327	20542	102189372,106504013,102185858,108637349,102191831,102191313,102180994
GO:0042470	melanosome	cellular_component	0.17474	1	287	13	20542	102173394
GO:0048770	pigment granule	cellular_component	0.17474	1	287	13	20542	102173394
GO:0097034	mitochondrial respiratory chain complex IV biogenesis	biological_process	0.17594	1	287	13	20542	102186482
GO:0019866	organelle inner membrane	cellular_component	0.17635	4	287	162	20542	102191313,102180611,102191831,102185309
GO:0000275	mitochondrial proton-transporting ATP synthase complex, catalytic core F(1)	cellular_component	0.1771	1	287	14	20542	102191313
GO:0005942	phosphatidylinositol 3-kinase complex	cellular_component	0.17832	1	287	13	20542	102169858
GO:0005944	phosphatidylinositol 3-kinase complex, class IB	cellular_component	0.17832	1	287	13	20542	102169858
GO:0035014	phosphatidylinositol 3-kinase regulator activity	molecular_function	0.17832	1	287	13	20542	102169858
GO:0046935	1-phosphatidylinositol-3-kinase regulator activity	molecular_function	0.17832	1	287	13	20542	102169858
GO:0097651	phosphatidylinositol 3-kinase complex, class I	cellular_component	0.17832	1	287	13	20542	102169858
GO:0004526	ribonuclease P activity	molecular_function	0.17858	1	287	13	20542	102169786
GO:0006821	chloride transport	biological_process	0.17921	1	287	13	20542	100750232
GO:0000287	magnesium ion binding	molecular_function	0.17941	3	287	103	20542	102180885,108637349,102180994
GO:0031929	TOR signaling	biological_process	0.17967	1	287	13	20542	102171008
GO:0032006	regulation of TOR signaling	biological_process	0.17967	1	287	13	20542	102171008
GO:0006753	nucleoside phosphate metabolic process	biological_process	0.18003	7	287	331	20542	102189372,106504013,102185858,102191831,108637349,102191313,102180994
GO:0008649	rRNA methyltransferase activity	molecular_function	0.18117	1	287	13	20542	102187196
GO:0030111	regulation of Wnt signaling pathway	biological_process	0.18159	1	287	13	20542	102183492
GO:0019783	ubiquitin-like protein-specific protease activity	molecular_function	0.18208	2	287	61	20542	102181634,102168955
GO:0015075	ion transmembrane transporter activity	molecular_function	0.18272	22	287	1215	20542	102178936,102179783,108635491,100750232,102186512,102189772,102174895,102187396,102175177,102186504,102173685,102173224,102180391,102168606,100861292,102191076,102186276,102168759,102185309,102171391,102179313,100861026
GO:0030414	peptidase inhibitor activity	molecular_function	0.18373	4	287	153	20542	102172450,102171106,102168282,102178021
GO:0061134	peptidase regulator activity	molecular_function	0.18373	4	287	153	20542	102172450,102178021,102168282,102171106
GO:0016597	amino acid binding	molecular_function	0.18452	1	287	13	20542	102179779
GO:0031324	negative regulation of cellular metabolic process	biological_process	0.18568	3	287	102	20542	102170846,102191313,102173992
GO:0008013	beta-catenin binding	molecular_function	0.18574	1	287	13	20542	102173591
GO:0006120	mitochondrial electron transport, NADH to ubiquinone	biological_process	0.18854	1	287	14	20542	106504013
GO:0048523	negative regulation of cellular process	biological_process	0.1896	5	287	209	20542	102170846,102191313,102173992,102169433,102183492
GO:0010008	endosome membrane	cellular_component	0.19098	1	287	14	20542	102173992
GO:0004867	serine-type endopeptidase inhibitor activity	molecular_function	0.19138	2	287	53	20542	102178021,102172450
GO:0006614	SRP-dependent cotranslational protein targeting to membrane	biological_process	0.19186	2	287	55	20542	102189849,102187396
GO:0045047	protein targeting to ER	biological_process	0.19186	2	287	55	20542	102189849,102187396
GO:0072599	establishment of protein localization to endoplasmic reticulum	biological_process	0.19186	2	287	55	20542	102189849,102187396
GO:0030529	ribonucleoprotein complex	cellular_component	0.19479	15	287	970	20542	102183123,102181246,106502612,102174549,102187701,102185309,102177425,106503454,102173281,106503606,102185100,102180885,102173754,102188426,102176501
GO:0010639	negative regulation of organelle organization	biological_process	0.19522	2	287	57	20542	102169433,102170846
GO:0008677	2-dehydropantoate 2-reductase activity	molecular_function	0.19531	1	287	14	20542	102189681
GO:0008201	heparin binding	molecular_function	0.19558	1	287	14	20542	100860957
GO:0000723	telomere maintenance	biological_process	0.19666	1	287	14	20542	102189849
GO:0032200	telomere organization	biological_process	0.19666	1	287	14	20542	102189849
GO:0060249	anatomical structure homeostasis	biological_process	0.19666	1	287	14	20542	102189849
GO:0006099	tricarboxylic acid cycle	biological_process	0.19691	1	287	16	20542	102189681
GO:0006101	citrate metabolic process	biological_process	0.19691	1	287	16	20542	102189681
GO:0010466	negative regulation of peptidase activity	biological_process	0.19811	1	287	15	20542	102173992
GO:0010951	negative regulation of endopeptidase activity	biological_process	0.19811	1	287	15	20542	102173992
GO:0046034	ATP metabolic process	biological_process	0.19952	4	287	166	20542	102189372,106504013,102191831,102191313
GO:0006278	RNA-dependent DNA replication	biological_process	0.19967	1	287	16	20542	102180081
GO:0031099	regeneration	biological_process	0.19975	1	287	16	20542	102179783
GO:0042246	tissue regeneration	biological_process	0.19975	1	287	16	20542	102179783
GO:0048589	developmental growth	biological_process	0.19975	1	287	16	20542	102179783
GO:0032324	molybdopterin cofactor biosynthetic process	biological_process	0.20081	1	287	16	20542	102171985
GO:0043545	molybdopterin cofactor metabolic process	biological_process	0.20081	1	287	16	20542	102171985
GO:0045595	regulation of cell differentiation	biological_process	0.20266	1	287	15	20542	108637147
GO:0004497	monooxygenase activity	molecular_function	0.20333	2	287	55	20542	102179682,102181032
GO:0005912	adherens junction	cellular_component	0.20385	1	287	16	20542	102184810
GO:0005924	cell-substrate adherens junction	cellular_component	0.20385	1	287	16	20542	102184810
GO:0005925	focal adhesion	cellular_component	0.20385	1	287	16	20542	102184810
GO:0030055	cell-substrate junction	cellular_component	0.20385	1	287	16	20542	102184810
GO:0070161	anchoring junction	cellular_component	0.20385	1	287	16	20542	102184810
GO:0016705	oxidoreductase activity, acting on paired donors, with incorporation or reduction of molecular oxygen	molecular_function	0.20606	5	287	205	20542	102185641,102189681,102179682,102174710,102181032
GO:0016714	oxidoreductase activity, acting on paired donors, with incorporation or reduction of molecular oxygen, reduced pteridine as one donor, and incorporation of one atom of oxygen	molecular_function	0.20708	1	287	15	20542	102181032
GO:0010605	negative regulation of macromolecule metabolic process	biological_process	0.20819	3	287	108	20542	102191313,102173992,102170846
GO:0031369	translation initiation factor binding	molecular_function	0.20892	1	287	16	20542	102191313
GO:0017148	negative regulation of translation	biological_process	0.20903	1	287	16	20542	102191313
GO:0034249	negative regulation of cellular amide metabolic process	biological_process	0.20903	1	287	16	20542	102191313
GO:0005882	intermediate filament	cellular_component	0.20983	5	287	235	20542	102172616,102171391,102176043,102178163,102188188
GO:0045111	intermediate filament cytoskeleton	cellular_component	0.20983	5	287	235	20542	102172616,102171391,102178163,102188188,102176043
GO:0008104	protein localization	biological_process	0.21053	15	287	801	20542	102181071,102189849,102186276,102171485,108636774,102172287,102173962,102169825,102187396,102179863,102188410,108635007,102188823,102187638,102172470
GO:0033108	mitochondrial respiratory chain complex assembly	biological_process	0.21102	1	287	16	20542	102186482
GO:0030234	enzyme regulator activity	molecular_function	0.21163	9	287	451	20542	102173436,102169858,102168282,102171106,108634545,102170793,102172450,102172653,102178021
GO:0005768	endosome	cellular_component	0.21168	1	287	16	20542	102173992
GO:0044440	endosomal part	cellular_component	0.21168	1	287	16	20542	102173992
GO:0008092	cytoskeletal protein binding	molecular_function	0.21198	11	287	560	20542	102182015,102177456,102186276,102177296,102179716,102184459,102188823,100860761,102191317,108637113,102180081
GO:0003964	RNA-directed DNA polymerase activity	molecular_function	0.21229	1	287	17	20542	102180081
GO:0015672	monovalent inorganic cation transport	biological_process	0.21453	9	287	452	20542	102179783,102173685,102168606,102174895,102186276,102189772,100861026,102175177,102171391
GO:0016874	ligase activity	molecular_function	0.21493	5	287	215	20542	102178168,102184459,102179779,102174367,102178200
GO:0007155	cell adhesion	biological_process	0.2156	8	287	385	20542	108636357,102182980,102169849,102185302,102174895,102175177,102189372,102172105
GO:0030435	sporulation resulting in formation of a cellular spore	biological_process	0.21592	1	287	16	20542	108637147
GO:0031012	extracellular matrix	cellular_component	0.21611	5	287	212	20542	102180048,102191474,102189774,102178363,102190639
GO:0000956	nuclear-transcribed mRNA catabolic process	biological_process	0.2176	1	287	16	20542	102189849
GO:0045261	proton-transporting ATP synthase complex, catalytic core F(1)	cellular_component	0.21897	1	287	18	20542	102191313
GO:0022610	biological adhesion	biological_process	0.22186	8	287	388	20542	102182980,108636357,102172105,102175177,102189372,102185302,102174895,102169849
GO:0098589	membrane region	cellular_component	0.22526	1	287	17	20542	102173992
GO:0051189	prosthetic group metabolic process	biological_process	0.22582	1	287	18	20542	102171985
GO:0010883	regulation of lipid storage	biological_process	0.22593	1	287	17	20542	102172287
GO:0010884	positive regulation of lipid storage	biological_process	0.22593	1	287	17	20542	102172287
GO:0009150	purine ribonucleotide metabolic process	biological_process	0.22751	5	287	231	20542	106504013,102189372,102191313,102191831,102185858
GO:0005665	DNA-directed RNA polymerase II, core complex	cellular_component	0.228	1	287	19	20542	102170574
GO:0071941	nitrogen cycle metabolic process	biological_process	0.22929	1	287	18	20542	102168955
GO:0009126	purine nucleoside monophosphate metabolic process	biological_process	0.22991	4	287	176	20542	102191313,102191831,102189372,106504013
GO:0009167	purine ribonucleoside monophosphate metabolic process	biological_process	0.22991	4	287	176	20542	102191313,102191831,106504013,102189372
GO:0006613	cotranslational protein targeting to membrane	biological_process	0.22999	2	287	62	20542	102189849,102187396
GO:0048038	quinone binding	molecular_function	0.23119	1	287	18	20542	102182991
GO:0009144	purine nucleoside triphosphate metabolic process	biological_process	0.2319	4	287	177	20542	102191313,102191831,106504013,102189372
GO:0009199	ribonucleoside triphosphate metabolic process	biological_process	0.2319	4	287	177	20542	102191831,102191313,102189372,106504013
GO:0009205	purine ribonucleoside triphosphate metabolic process	biological_process	0.2319	4	287	177	20542	102189372,106504013,102191313,102191831
GO:0045202	synapse	cellular_component	0.23302	1	287	17	20542	102169933
GO:0022891	substrate-specific transmembrane transporter activity	molecular_function	0.23363	22	287	1263	20542	102186504,102175177,102187396,102174895,102189772,102186512,100750232,102179783,108635491,102178936,100861026,102179313,102171391,102185309,102168759,102186276,102191076,100861292,102168606,102180391,102173685,102173224
GO:0009968	negative regulation of signal transduction	biological_process	0.23409	1	287	18	20542	102183492
GO:0004017	adenylate kinase activity	molecular_function	0.23441	4	287	166	20542	102179804,102187196,102169746,102178331
GO:0070925	organelle assembly	biological_process	0.23535	3	287	115	20542	102178163,106502661,108634456
GO:0006612	protein targeting to membrane	biological_process	0.23577	2	287	63	20542	102189849,102187396
GO:0009259	ribonucleotide metabolic process	biological_process	0.23617	5	287	234	20542	102191313,102191831,102185858,106504013,102189372
GO:0008289	lipid binding	molecular_function	0.23627	6	287	278	20542	102176556,102185756,102180522,102188823,102181071,102171485
GO:0016055	Wnt signaling pathway	biological_process	0.23747	2	287	61	20542	102185756,102183492
GO:0030162	regulation of proteolysis	biological_process	0.23905	2	287	64	20542	102170846,102173992
GO:0032065	cortical protein anchoring	biological_process	0.23931	1	287	18	20542	102171485
GO:0009161	ribonucleoside monophosphate metabolic process	biological_process	0.24004	4	287	179	20542	102191831,102191313,102189372,106504013
GO:0030163	protein catabolic process	biological_process	0.24016	4	287	178	20542	102170846,102183790,102172653,102172616
GO:0032182	ubiquitin-like protein binding	molecular_function	0.24058	2	287	72	20542	102181634,102168955
GO:0031406	carboxylic acid binding	molecular_function	0.24081	1	287	18	20542	102179779
GO:0043177	organic acid binding	molecular_function	0.24081	1	287	18	20542	102179779
GO:0019882	antigen processing and presentation	biological_process	0.24088	2	287	67	20542	102189356,108635007
GO:0071944	cell periphery	cellular_component	0.24093	12	287	659	20542	102178163,102172616,102174835,102175861,108636774,102181244,102171485,106502552,106502661,102185858,102189356,102173343
GO:0030176	integral component of endoplasmic reticulum membrane	cellular_component	0.24703	2	287	66	20542	102169825,102179863
GO:0031227	intrinsic component of endoplasmic reticulum membrane	cellular_component	0.24703	2	287	66	20542	102179863,102169825
GO:0009123	nucleoside monophosphate metabolic process	biological_process	0.24831	4	287	182	20542	102191831,102191313,102189372,106504013
GO:0019693	ribose phosphate metabolic process	biological_process	0.24848	5	287	239	20542	102191831,102185858,102191313,106504013,102189372
GO:0004435	phosphatidylinositol phospholipase C activity	molecular_function	0.24879	1	287	18	20542	102190639
GO:0004629	phospholipase C activity	molecular_function	0.24879	1	287	18	20542	102190639
GO:0055036	virion membrane	cellular_component	0.24881	1	287	20	20542	102171391
GO:0019354	siroheme biosynthetic process	biological_process	0.25067	1	287	19	20542	102189681
GO:0043115	precorrin-2 dehydrogenase activity	molecular_function	0.25067	1	287	19	20542	102189681
GO:0046156	siroheme metabolic process	biological_process	0.25067	1	287	19	20542	102189681
GO:0006163	purine nucleotide metabolic process	biological_process	0.25073	5	287	240	20542	102191313,102185858,102191831,102189372,106504013
GO:0016651	oxidoreductase activity, acting on NAD(P)H	molecular_function	0.25293	4	287	175	20542	102191831,102171485,106504013,102189372
GO:0005319	lipid transporter activity	molecular_function	0.25297	1	287	19	20542	102188823
GO:0030077	plasma membrane light-harvesting complex	cellular_component	0.25327	1	287	19	20542	102185858
GO:0042716	plasma membrane-derived chromatophore	cellular_component	0.25327	1	287	19	20542	102185858
GO:0022836	gated channel activity	molecular_function	0.25334	6	287	283	20542	102186276,100750232,102179783,102186504,102179313,102185309
GO:0016972	thiol oxidase activity	molecular_function	0.25372	1	287	21	20542	102189594
GO:0019773	proteasome core complex, alpha-subunit complex	cellular_component	0.25376	1	287	20	20542	102172616
GO:0022857	transmembrane transporter activity	molecular_function	0.25476	25	287	1468	20542	102186276,106502661,102191076,100861292,100861026,102179313,102185309,102168759,102171391,102180391,102173224,102173685,102185895,102168606,102174895,102170261,102189772,102186512,102186504,102187396,102175177,100750232,102179783,108635491,102178936
GO:0000808	origin recognition complex	cellular_component	0.25497	1	287	19	20542	102175861
GO:0030042	actin filament depolymerization	biological_process	0.25622	1	287	21	20542	102169433
GO:0030834	regulation of actin filament depolymerization	biological_process	0.25622	1	287	21	20542	102169433
GO:0030835	negative regulation of actin filament depolymerization	biological_process	0.25622	1	287	21	20542	102169433
GO:0030837	negative regulation of actin filament polymerization	biological_process	0.25622	1	287	21	20542	102169433
GO:0031333	negative regulation of protein complex assembly	biological_process	0.25622	1	287	21	20542	102169433
GO:0032272	negative regulation of protein polymerization	biological_process	0.25622	1	287	21	20542	102169433
GO:0051261	protein depolymerization	biological_process	0.25622	1	287	21	20542	102169433
GO:0051693	actin filament capping	biological_process	0.25622	1	287	21	20542	102169433
GO:1901879	regulation of protein depolymerization	biological_process	0.25622	1	287	21	20542	102169433
GO:1901880	negative regulation of protein depolymerization	biological_process	0.25622	1	287	21	20542	102169433
GO:0022892	substrate-specific transporter activity	molecular_function	0.25819	23	287	1348	20542	102168606,102173224,102173685,102180391,102185309,102171391,102168759,102179313,100861026,100861292,102191076,102186276,102188823,102178936,102179783,108635491,100750232,102175177,102187396,102186504,102186512,102189772,102174895
GO:0009060	aerobic respiration	biological_process	0.25828	1	287	21	20542	102189681
GO:0072350	tricarboxylic acid metabolic process	biological_process	0.25828	1	287	21	20542	102189681
GO:0005234	extracellular-glutamate-gated ion channel activity	molecular_function	0.25939	1	287	19	20542	102179313
GO:0051262	protein tetramerization	biological_process	0.25955	1	287	19	20542	102180907
GO:0005267	potassium channel activity	molecular_function	0.26168	3	287	118	20542	102186276,102179783,102186504
GO:0050840	extracellular matrix binding	molecular_function	0.26285	1	287	20	20542	102172616
GO:0051094	positive regulation of developmental process	biological_process	0.2631	1	287	20	20542	108637147
GO:0043242	negative regulation of protein complex disassembly	biological_process	0.26315	1	287	22	20542	102169433
GO:0035091	phosphatidylinositol binding	molecular_function	0.26362	2	287	66	20542	102180522,102176556
GO:0009141	nucleoside triphosphate metabolic process	biological_process	0.26362	4	287	190	20542	102189372,106504013,102191313,102191831
GO:0016877	ligase activity, forming carbon-sulfur bonds	molecular_function	0.26384	1	287	20	20542	102184459
GO:0045156	electron transporter, transferring electrons within the cyclic electron transport pathway of photosynthesis activity	molecular_function	0.26493	1	287	20	20542	102185858
GO:0006418	tRNA aminoacylation for protein translation	biological_process	0.26526	2	287	68	20542	102178168,102174367
GO:0000103	sulfate assimilation	biological_process	0.26628	1	287	20	20542	102185895
GO:0004020	adenylylsulfate kinase activity	molecular_function	0.26628	1	287	20	20542	102185895
GO:0051301	cell division	biological_process	0.26659	4	287	179	20542	102187922,102174369,102180661,102170846
GO:0004869	cysteine-type endopeptidase inhibitor activity	molecular_function	0.2667	1	287	24	20542	102171106
GO:0008083	growth factor activity	molecular_function	0.26811	3	287	125	20542	102179779,108637113,100860957
GO:0051129	negative regulation of cellular component organization	biological_process	0.26833	2	287	71	20542	102169433,102170846
GO:0043281	regulation of cysteine-type endopeptidase activity involved in apoptotic process	biological_process	0.26833	1	287	21	20542	102173992
GO:2000116	regulation of cysteine-type endopeptidase activity	biological_process	0.26833	1	287	21	20542	102173992
GO:0006935	chemotaxis	biological_process	0.26884	2	287	70	20542	102172234,102171645
GO:0042330	taxis	biological_process	0.26884	2	287	70	20542	102171645,102172234
GO:0019915	lipid storage	biological_process	0.2689	1	287	21	20542	102172287
GO:0072521	purine-containing compound metabolic process	biological_process	0.26975	5	287	247	20542	102185858,102191831,102191313,102189372,106504013
GO:0010648	negative regulation of cell communication	biological_process	0.26976	1	287	21	20542	102183492
GO:0023057	negative regulation of signaling	biological_process	0.26976	1	287	21	20542	102183492
GO:1901505	carbohydrate derivative transporter activity	molecular_function	0.27003	1	287	21	20542	102188823
GO:0046332	SMAD binding	molecular_function	0.27112	1	287	22	20542	102181899
GO:0004812	aminoacyl-tRNA ligase activity	molecular_function	0.27353	2	287	69	20542	102174367,102178168
GO:0016846	carbon-sulfur lyase activity	molecular_function	0.27392	1	287	21	20542	102177833
GO:0016776	phosphotransferase activity, phosphate group as acceptor	molecular_function	0.27419	4	287	179	20542	102169746,102187196,102179804,102178331
GO:0044267	cellular protein metabolic process	biological_process	0.275	41	287	2715	20542	108634545,102184810,102191313,102190009,100861310,106503454,102170846,102174367,102176043,106503606,100861158,102183434,102184414,102181246,102171985,106502612,100861116,102174549,102187701,102187396,102180282,102191317,102168282,102176501,102188484,102183123,102173992,102185309,102175805,102177453,102177425,102173281,102180885,102183790,102171047,102168955,102178168,102182887,102185100,102188426…
GO:0008380	RNA splicing	biological_process	0.27579	2	287	71	20542	102187396,102174830
GO:0005507	copper ion binding	molecular_function	0.27641	2	287	71	20542	102182991,102179682
GO:0005540	hyaluronic acid binding	molecular_function	0.2767	1	287	21	20542	102172105
GO:0032268	regulation of cellular protein metabolic process	biological_process	0.27688	3	287	125	20542	102170846,102191313,102173992
GO:0043086	negative regulation of catalytic activity	biological_process	0.27759	2	287	71	20542	102170846,102173992
GO:0044092	negative regulation of molecular function	biological_process	0.27759	2	287	71	20542	102173992,102170846
GO:0009036	Type II site-specific deoxyribonuclease activity	molecular_function	0.28177	1	287	22	20542	102184810
GO:0015666	restriction endodeoxyribonuclease activity	molecular_function	0.28177	1	287	22	20542	102184810
GO:0043228	non-membrane-bounded organelle	cellular_component	0.28444	25	287	1695	20542	102180885,106503606,106504013,106503454,102177425,102173281,102176043,102178163,102185309,102171391,102183123,106502661,102188426,102175861,102173754,102176501,102185100,102172616,102188188,106502612,102171645,102181246,102174549,102187701,102169433
GO:0003777	microtubule motor activity	molecular_function	0.28457	2	287	69	20542	102188823,102180081
GO:0055086	nucleobase-containing small molecule metabolic process	biological_process	0.2855	7	287	379	20542	106504013,102189372,102191313,102180994,108637349,102191831,102185858
GO:0016071	mRNA metabolic process	biological_process	0.28737	5	287	244	20542	102187396,102190985,108637376,102188324,102189849
GO:0007276	gamete generation	biological_process	0.28765	3	287	132	20542	102181244,106502552,102174835
GO:0042775	mitochondrial ATP synthesis coupled electron transport	biological_process	0.28983	1	287	26	20542	106504013
GO:0043087	regulation of GTPase activity	biological_process	0.28999	1	287	22	20542	102184374
GO:0009892	negative regulation of metabolic process	biological_process	0.29039	3	287	130	20542	102191313,102173992,102170846
GO:0019637	organophosphate metabolic process	biological_process	0.29134	9	287	506	20542	108634151,106504013,102191831,108637349,102180994,102189372,102185858,102171985,102191313
GO:0009307	DNA restriction-modification system	biological_process	0.29298	1	287	23	20542	102184810
GO:0044355	clearance of foreign intracellular DNA	biological_process	0.29298	1	287	23	20542	102184810
GO:0030312	external encapsulating structure	cellular_component	0.29462	3	287	129	20542	102181244,106502552,102174835
GO:0052652	cyclic purine nucleotide metabolic process	biological_process	0.29482	1	287	22	20542	102185858
GO:0030076	light-harvesting complex	cellular_component	0.29498	1	287	23	20542	102185858
GO:0032502	developmental process	biological_process	0.29609	10	287	562	20542	102179783,102172052,108637147,102174835,106502552,102181244,102177558,102183492,102172234,102173394
GO:0001816	cytokine production	biological_process	0.29633	1	287	24	20542	102172287
GO:0001817	regulation of cytokine production	biological_process	0.29633	1	287	24	20542	102172287
GO:0001819	positive regulation of cytokine production	biological_process	0.29633	1	287	24	20542	102172287
GO:0006783	heme biosynthetic process	biological_process	0.29685	1	287	23	20542	102189681
GO:0006897	endocytosis	biological_process	0.29971	1	287	27	20542	102169933
GO:0019201	nucleotide kinase activity	molecular_function	0.3003	4	287	187	20542	102169746,102187196,102179804,102178331
GO:0008373	sialyltransferase activity	molecular_function	0.30106	1	287	23	20542	100861310
GO:0015718	monocarboxylic acid transport	biological_process	0.30137	1	287	25	20542	102185309
GO:0051494	negative regulation of cytoskeleton organization	biological_process	0.30411	1	287	26	20542	102169433
GO:1901566	organonitrogen compound biosynthetic process	biological_process	0.3043	21	287	1442	20542	102189681,106503606,102180885,102173281,102174367,106503454,102177425,102185309,102191313,102185858,102183123,102188426,102176501,102185100,102172052,102178168,102187701,102174549,106502612,102171985,102181246
GO:0004127	cytidylate kinase activity	molecular_function	0.30577	1	287	25	20542	102178331
GO:0019835	cytolysis	biological_process	0.30612	1	287	23	20542	102172616
GO:0035556	intracellular signal transduction	biological_process	0.30626	15	287	866	20542	102170196,102183648,102169746,102187396,102181032,102171485,102184845,102185858,102169875,102169933,102172616,102188484,102190639,102187814,102171008
GO:1902578	single-organism localization	biological_process	0.30849	36	287	2226	20542	102171485,108633345,102185309,102168759,102173224,102173685,102168637,102186504,102186482,102179783,108635491,100750232,102172616,102172470,102182991,108636774,102186276,100861292,102191076,100861026,102172653,102177558,102171391,102180391,102185895,102168606,102189772,102174895,102189849,102170261,102172287,102186512,102175177,102187396,102188823,102187638
GO:0016641	oxidoreductase activity, acting on the CH-NH2 group of donors, oxygen as acceptor	molecular_function	0.30851	1	287	25	20542	102182991
GO:0051336	regulation of hydrolase activity	biological_process	0.31002	2	287	76	20542	102173992,102184374
GO:0043232	intracellular non-membrane-bounded organelle	cellular_component	0.31181	24	287	1653	20542	102188188,102188426,102176501,102175861,102173754,102185100,102172616,106502612,102181246,102187701,102174549,102169433,106503454,102177425,102176043,102173281,102178163,106503606,102180885,106504013,102183123,106502661,102185309,102171391
GO:0015079	potassium ion transmembrane transporter activity	molecular_function	0.31198	3	287	130	20542	102186504,102179783,102186276
GO:0016670	oxidoreductase activity, acting on a sulfur group of donors, oxygen as acceptor	molecular_function	0.31308	1	287	27	20542	102189594
GO:0007018	microtubule-based movement	biological_process	0.31371	2	287	74	20542	102188823,102180081
GO:0043038	amino acid activation	biological_process	0.31402	2	287	77	20542	102178168,102174367
GO:0043039	tRNA aminoacylation	biological_process	0.31402	2	287	77	20542	102174367,102178168
GO:0000746	conjugation	biological_process	0.31434	1	287	25	20542	102172470
GO:0008284	positive regulation of cell proliferation	biological_process	0.31483	1	287	25	20542	102172287
GO:0005244	voltage-gated ion channel activity	molecular_function	0.3156	3	287	132	20542	102186504,102179783,100750232
GO:0022832	voltage-gated channel activity	molecular_function	0.3156	3	287	132	20542	102179783,100750232,102186504
GO:0043623	cellular protein complex assembly	biological_process	0.31562	6	287	318	20542	102169433,102178163,108634456,102184810,106502661,102186482
GO:0016010	dystrophin-associated glycoprotein complex	cellular_component	0.31657	1	287	25	20542	108636774
GO:0016875	ligase activity, forming carbon-oxygen bonds	molecular_function	0.31699	2	287	77	20542	102174367,102178168
GO:0016876	ligase activity, forming aminoacyl-tRNA and related compounds	molecular_function	0.31699	2	287	77	20542	102178168,102174367
GO:0005227	calcium activated cation channel activity	molecular_function	0.31822	1	287	25	20542	102186276
GO:0015269	calcium-activated potassium channel activity	molecular_function	0.31822	1	287	25	20542	102186276
GO:0022839	ion gated channel activity	molecular_function	0.31822	1	287	25	20542	102186276
GO:0048519	negative regulation of biological process	biological_process	0.31891	5	287	257	20542	102183492,102191313,102173992,102169433,102170846
GO:0016108	tetraterpenoid metabolic process	biological_process	0.3197	1	287	25	20542	102189681
GO:0016109	tetraterpenoid biosynthetic process	biological_process	0.3197	1	287	25	20542	102189681
GO:0016116	carotenoid metabolic process	biological_process	0.3197	1	287	25	20542	102189681
GO:0016117	carotenoid biosynthetic process	biological_process	0.3197	1	287	25	20542	102189681
GO:0005747	mitochondrial respiratory chain complex I	cellular_component	0.32029	1	287	28	20542	102180611
GO:0030964	NADH dehydrogenase complex	cellular_component	0.32029	1	287	28	20542	102180611
GO:0045271	respiratory chain complex I	cellular_component	0.32029	1	287	28	20542	102180611
GO:0006457	protein folding	biological_process	0.32061	3	287	145	20542	102176043,100861116,102175805
GO:0006417	regulation of translation	biological_process	0.32464	1	287	27	20542	102191313
GO:0034248	regulation of cellular amide metabolic process	biological_process	0.32464	1	287	27	20542	102191313
GO:0004521	endoribonuclease activity	molecular_function	0.32498	2	287	84	20542	102169786,102174830
GO:0033036	macromolecule localization	biological_process	0.32611	16	287	945	20542	102172470,102187638,102188823,102186482,102188410,102179863,102187396,102172287,102189849,108635007,102169825,102173962,102171485,108636774,102181071,102186276
GO:0006873	cellular ion homeostasis	biological_process	0.32818	2	287	92	20542	108633376,108633422
GO:0006875	cellular metal ion homeostasis	biological_process	0.32818	2	287	92	20542	108633376,108633422
GO:0030003	cellular cation homeostasis	biological_process	0.32818	2	287	92	20542	108633422,108633376
GO:0040007	growth	biological_process	0.32966	2	287	82	20542	102179783,108637113
GO:0042278	purine nucleoside metabolic process	biological_process	0.32984	4	287	208	20542	102191831,102191313,106504013,102189372
GO:0046128	purine ribonucleoside metabolic process	biological_process	0.32984	4	287	208	20542	102189372,106504013,102191831,102191313
GO:0007009	plasma membrane organization	biological_process	0.33043	1	287	27	20542	102184374
GO:0031329	regulation of cellular catabolic process	biological_process	0.33176	3	287	137	20542	102170846,102178163,102171391
GO:0042592	homeostatic process	biological_process	0.33223	4	287	209	20542	102189849,108633376,102189594,108633422
GO:0006289	nucleotide-excision repair	biological_process	0.33299	1	287	26	20542	102183790
GO:0017080	sodium channel regulator activity	molecular_function	0.33402	1	287	29	20542	102172653
GO:0019871	sodium channel inhibitor activity	molecular_function	0.33402	1	287	29	20542	102172653
GO:0048609	multicellular organismal reproductive process	biological_process	0.33434	3	287	143	20542	106502552,102181244,102174835
GO:0010608	posttranscriptional regulation of gene expression	biological_process	0.3353	1	287	28	20542	102191313
GO:0006406	mRNA export from nucleus	biological_process	0.33639	1	287	26	20542	102186482
GO:0071166	ribonucleoprotein complex localization	biological_process	0.33639	1	287	26	20542	102186482
GO:0071426	ribonucleoprotein complex export from nucleus	biological_process	0.33639	1	287	26	20542	102186482
GO:0071427	mRNA-containing ribonucleoprotein complex export from nucleus	biological_process	0.33639	1	287	26	20542	102186482
GO:0016879	ligase activity, forming carbon-nitrogen bonds	molecular_function	0.33777	2	287	81	20542	102179779,102178200
GO:0044265	cellular macromolecule catabolic process	biological_process	0.33842	4	287	206	20542	102172616,102189849,102183790,102170846
GO:0005231	excitatory extracellular ligand-gated ion channel activity	molecular_function	0.34172	1	287	27	20542	102179313
GO:0051382	kinetochore assembly	biological_process	0.3418	1	287	29	20542	108634456
GO:0051383	kinetochore organization	biological_process	0.3418	1	287	29	20542	108634456
GO:0004177	aminopeptidase activity	molecular_function	0.34181	1	287	28	20542	102183492
GO:0003684	damaged DNA binding	molecular_function	0.34271	1	287	27	20542	102183790
GO:0050801	ion homeostasis	biological_process	0.34304	2	287	95	20542	108633422,108633376
GO:0055065	metal ion homeostasis	biological_process	0.34304	2	287	95	20542	108633376,108633422
GO:0055080	cation homeostasis	biological_process	0.34304	2	287	95	20542	108633422,108633376
GO:0098771	inorganic ion homeostasis	biological_process	0.34304	2	287	95	20542	108633422,108633376
GO:0009057	macromolecule catabolic process	biological_process	0.34336	5	287	271	20542	102172653,102172616,102189849,102170846,102183790
GO:0009064	glutamine family amino acid metabolic process	biological_process	0.34486	1	287	29	20542	102179779
GO:0006405	RNA export from nucleus	biological_process	0.34687	1	287	27	20542	102186482
GO:0009165	nucleotide biosynthetic process	biological_process	0.34774	4	287	212	20542	102191313,102180994,102185858,108637349
GO:1901293	nucleoside phosphate biosynthetic process	biological_process	0.34774	4	287	212	20542	102185858,108637349,102180994,102191313
GO:0005783	endoplasmic reticulum	cellular_component	0.34944	5	287	266	20542	102169825,102179863,102178640,108633345,102181899
GO:0006511	ubiquitin-dependent protein catabolic process	biological_process	0.34969	3	287	147	20542	102183790,102170846,102172616
GO:0052547	regulation of peptidase activity	biological_process	0.35032	1	287	29	20542	102173992
GO:0052548	regulation of endopeptidase activity	biological_process	0.35032	1	287	29	20542	102173992
GO:0019941	modification-dependent protein catabolic process	biological_process	0.35229	3	287	148	20542	102183790,102170846,102172616
GO:0043632	modification-dependent macromolecule catabolic process	biological_process	0.35229	3	287	148	20542	102183790,102170846,102172616
GO:0006979	response to oxidative stress	biological_process	0.35555	1	287	31	20542	102171670
GO:0042127	regulation of cell proliferation	biological_process	0.35609	1	287	29	20542	102172287
GO:0007094	mitotic spindle assembly checkpoint	biological_process	0.35645	1	287	30	20542	102170846
GO:0009895	negative regulation of catabolic process	biological_process	0.35645	1	287	30	20542	102170846
GO:0031330	negative regulation of cellular catabolic process	biological_process	0.35645	1	287	30	20542	102170846
GO:0031396	regulation of protein ubiquitination	biological_process	0.35645	1	287	30	20542	102170846
GO:0031397	negative regulation of protein ubiquitination	biological_process	0.35645	1	287	30	20542	102170846
GO:0031577	spindle checkpoint	biological_process	0.35645	1	287	30	20542	102170846
GO:0032435	negative regulation of proteasomal ubiquitin-dependent protein catabolic process	biological_process	0.35645	1	287	30	20542	102170846
GO:0033046	negative regulation of sister chromatid segregation	biological_process	0.35645	1	287	30	20542	102170846
GO:0033048	negative regulation of mitotic sister chromatid segregation	biological_process	0.35645	1	287	30	20542	102170846
GO:0042177	negative regulation of protein catabolic process	biological_process	0.35645	1	287	30	20542	102170846
GO:0045839	negative regulation of mitotic nuclear division	biological_process	0.35645	1	287	30	20542	102170846
GO:0045841	negative regulation of mitotic metaphase/anaphase transition	biological_process	0.35645	1	287	30	20542	102170846
GO:0051340	regulation of ligase activity	biological_process	0.35645	1	287	30	20542	102170846
GO:0051352	negative regulation of ligase activity	biological_process	0.35645	1	287	30	20542	102170846
GO:0051436	negative regulation of ubiquitin-protein ligase activity involved in mitotic cell cycle	biological_process	0.35645	1	287	30	20542	102170846
GO:0051438	regulation of ubiquitin-protein transferase activity	biological_process	0.35645	1	287	30	20542	102170846
GO:0051439	regulation of ubiquitin-protein ligase activity involved in mitotic cell cycle	biological_process	0.35645	1	287	30	20542	102170846
GO:0051444	negative regulation of ubiquitin-protein transferase activity	biological_process	0.35645	1	287	30	20542	102170846
GO:0051985	negative regulation of chromosome segregation	biological_process	0.35645	1	287	30	20542	102170846
GO:0071173	spindle assembly checkpoint	biological_process	0.35645	1	287	30	20542	102170846
GO:0071174	mitotic spindle checkpoint	biological_process	0.35645	1	287	30	20542	102170846
GO:1901799	negative regulation of proteasomal protein catabolic process	biological_process	0.35645	1	287	30	20542	102170846
GO:1902100	negative regulation of metaphase/anaphase transition of cell cycle	biological_process	0.35645	1	287	30	20542	102170846
GO:1903051	negative regulation of proteolysis involved in cellular protein catabolic process	biological_process	0.35645	1	287	30	20542	102170846
GO:1903320	regulation of protein modification by small protein conjugation or removal	biological_process	0.35645	1	287	30	20542	102170846
GO:1903321	negative regulation of protein modification by small protein conjugation or removal	biological_process	0.35645	1	287	30	20542	102170846
GO:1903363	negative regulation of cellular protein catabolic process	biological_process	0.35645	1	287	30	20542	102170846
GO:1904666	regulation of ubiquitin protein ligase activity	biological_process	0.35645	1	287	30	20542	102170846
GO:1904667	negative regulation of ubiquitin protein ligase activity	biological_process	0.35645	1	287	30	20542	102170846
GO:2000816	negative regulation of mitotic sister chromatid separation	biological_process	0.35645	1	287	30	20542	102170846
GO:2001251	negative regulation of chromosome organization	biological_process	0.35645	1	287	30	20542	102170846
GO:0034613	cellular protein localization	biological_process	0.35723	11	287	640	20542	102187638,108635007,102188410,102187396,102169825,102173962,102171485,108636774,102186276,102189849,102181071
GO:0070727	cellular macromolecule localization	biological_process	0.35723	11	287	640	20542	102187638,108635007,102188410,102169825,102187396,102173962,102189849,102186276,102181071,108636774,102171485
GO:0048585	negative regulation of response to stimulus	biological_process	0.35842	1	287	30	20542	102183492
GO:0006397	mRNA processing	biological_process	0.36063	4	287	209	20542	102187396,102190985,102188324,108637376
GO:0055082	cellular chemical homeostasis	biological_process	0.36356	2	287	99	20542	108633376,108633422
GO:0009896	positive regulation of catabolic process	biological_process	0.36504	2	287	86	20542	102178163,102171391
GO:0010508	positive regulation of autophagy	biological_process	0.36504	2	287	86	20542	102171391,102178163
GO:0031331	positive regulation of cellular catabolic process	biological_process	0.36504	2	287	86	20542	102178163,102171391
GO:0007093	mitotic cell cycle checkpoint	biological_process	0.3651	1	287	31	20542	102170846
GO:0044767	single-organism developmental process	biological_process	0.36552	9	287	529	20542	106502552,102181244,102183492,102173394,102172234,102179783,102172052,108637147,102174835
GO:1901988	negative regulation of cell cycle phase transition	biological_process	0.36661	1	287	31	20542	102170846
GO:1901991	negative regulation of mitotic cell cycle phase transition	biological_process	0.36661	1	287	31	20542	102170846
GO:0051784	negative regulation of nuclear division	biological_process	0.36661	1	287	31	20542	102170846
GO:0005515	protein binding	molecular_function	0.36691	95	287	6278	20542	102171485,102172450,102191102,102180907,102189594,102169637,102181041,102173760,108635007,106502149,102184459,102173685,102170196,102189372,102174019,102185302,102171047,102181032,102183790,102173388,102181899,102170529,102180081,100860761,102169825,102171391,102186276,102178363,102180522,102174608,102179779,102177296,102187803,102177885,100861074,102181634,102179019,102171405,102186316,102181610…
GO:0006839	mitochondrial transport	biological_process	0.36738	1	287	33	20542	102185309
GO:0019205	nucleobase-containing compound kinase activity	molecular_function	0.36868	4	287	208	20542	102178331,102187196,102179804,102169746
GO:0000278	mitotic cell cycle	biological_process	0.36948	4	287	209	20542	102187922,102174369,108634456,102170846
GO:1903047	mitotic cell cycle process	biological_process	0.36948	4	287	209	20542	102170846,108634456,102174369,102187922
GO:0051168	nuclear export	biological_process	0.37055	1	287	30	20542	102186482
GO:0009190	cyclic nucleotide biosynthetic process	biological_process	0.37089	1	287	30	20542	102185858
GO:0006402	mRNA catabolic process	biological_process	0.37144	1	287	30	20542	102189849
GO:0009119	ribonucleoside metabolic process	biological_process	0.37258	4	287	220	20542	102191313,102191831,102189372,106504013
GO:0050790	regulation of catalytic activity	biological_process	0.37262	3	287	148	20542	102170846,102173992,102184374
GO:0090150	establishment of protein localization to membrane	biological_process	0.3731	2	287	89	20542	102189849,102187396
GO:0043244	regulation of protein complex disassembly	biological_process	0.37431	1	287	34	20542	102169433
GO:0070566	adenylyltransferase activity	molecular_function	0.3749	1	287	33	20542	102172052
GO:0045930	negative regulation of mitotic cell cycle	biological_process	0.37512	1	287	32	20542	102170846
GO:0043093	FtsZ-dependent cytokinesis	biological_process	0.37823	2	287	90	20542	102187922,102174369
GO:0005249	voltage-gated potassium channel activity	molecular_function	0.37957	2	287	88	20542	102186504,102179783
GO:0055085	transmembrane transport	biological_process	0.38011	16	287	978	20542	102177558,102172653,102171391,102168759,102186276,108633345,102182991,102191076,100861292,102185895,102168606,102180391,102173224,102170261,100750232,108635491
GO:0030203	glycosaminoglycan metabolic process	biological_process	0.38021	1	287	31	20542	102178021
GO:0051782	negative regulation of cell division	biological_process	0.38397	1	287	33	20542	102170846
GO:0003677	DNA binding	molecular_function	0.38607	37	287	2460	20542	102185837,102171485,102170213,106502661,102172049,102189594,102170196,102183790,108635093,102183601,102172470,102185641,102169746,102174608,102184810,102187196,102187922,102190985,102180738,102170574,108634456,102188324,102178640,102173343,102172287,102185438,102189849,102175908,102168282,102175861,102172910,102190936,102179804,102174369,102178870,102191831,102189598
GO:0032504	multicellular organism reproduction	biological_process	0.38651	3	287	158	20542	102174835,102181244,106502552
GO:0009187	cyclic nucleotide metabolic process	biological_process	0.38751	1	287	32	20542	102185858
GO:0042168	heme metabolic process	biological_process	0.38777	1	287	33	20542	102189681
GO:0016706	oxidoreductase activity, acting on paired donors, with incorporation or reduction of molecular oxygen, 2-oxoglutarate as one donor, and incorporation of one atom each of oxygen into both donors	molecular_function	0.38846	1	287	31	20542	102185641
GO:0043934	sporulation	biological_process	0.38854	1	287	32	20542	108637147
GO:0006401	RNA catabolic process	biological_process	0.38863	1	287	32	20542	102189849
GO:0003774	motor activity	molecular_function	0.38881	3	287	147	20542	102180081,102188823,102171645
GO:0071973	bacterial-type flagellum-dependent cell motility	biological_process	0.38937	1	287	34	20542	102171645
GO:0032505	reproduction of a single-celled organism	biological_process	0.38943	2	287	92	20542	102174369,102187922
GO:0072657	protein localization to membrane	biological_process	0.38993	2	287	92	20542	102187396,102189849
GO:0007091	metaphase/anaphase transition of mitotic cell cycle	biological_process	0.39197	1	287	34	20542	102170846
GO:0010965	regulation of mitotic sister chromatid separation	biological_process	0.39197	1	287	34	20542	102170846
GO:0030071	regulation of mitotic metaphase/anaphase transition	biological_process	0.39197	1	287	34	20542	102170846
GO:0031145	anaphase-promoting complex-dependent proteasomal ubiquitin-dependent protein catabolic process	biological_process	0.39197	1	287	34	20542	102170846
GO:0032434	regulation of proteasomal ubiquitin-dependent protein catabolic process	biological_process	0.39197	1	287	34	20542	102170846
GO:0033044	regulation of chromosome organization	biological_process	0.39197	1	287	34	20542	102170846
GO:0033045	regulation of sister chromatid segregation	biological_process	0.39197	1	287	34	20542	102170846
GO:0033047	regulation of mitotic sister chromatid segregation	biological_process	0.39197	1	287	34	20542	102170846
GO:0044784	metaphase/anaphase transition of cell cycle	biological_process	0.39197	1	287	34	20542	102170846
GO:0051306	mitotic sister chromatid separation	biological_process	0.39197	1	287	34	20542	102170846
GO:0051983	regulation of chromosome segregation	biological_process	0.39197	1	287	34	20542	102170846
GO:1902099	regulation of metaphase/anaphase transition of cell cycle	biological_process	0.39197	1	287	34	20542	102170846
GO:0051346	negative regulation of hydrolase activity	biological_process	0.39271	1	287	34	20542	102173992
GO:0005201	extracellular matrix structural constituent	molecular_function	0.39298	1	287	32	20542	102172052
GO:0015103	inorganic anion transmembrane transporter activity	molecular_function	0.3942	1	287	33	20542	100750232
GO:0000917	barrier septum assembly	biological_process	0.39497	2	287	93	20542	102174369,102187922
GO:0032506	cytokinetic process	biological_process	0.39497	2	287	93	20542	102174369,102187922
GO:0090529	cell septum assembly	biological_process	0.39497	2	287	93	20542	102174369,102187922
GO:1902410	mitotic cytokinetic process	biological_process	0.39497	2	287	93	20542	102187922,102174369
GO:0051179	localization	biological_process	0.39544	46	287	2978	20542	108635491,102179783,100750232,102172616,102172470,102168637,102171645,102186504,102186482,108635007,102178163,102174981,102173224,102173685,102171485,102181071,108633345,102185309,102168759,102188823,102187638,102189772,102170261,102189849,102174895,102169933,102186512,102172287,102187396,102175177,102188410,102179863,102180391,102185895,102168606,102182991,108636774,102186276,102173962,100861292…
GO:0051348	negative regulation of transferase activity	biological_process	0.39613	1	287	34	20542	102170846
GO:0043066	negative regulation of apoptotic process	biological_process	0.39789	1	287	34	20542	102173992
GO:0043069	negative regulation of programmed cell death	biological_process	0.39789	1	287	34	20542	102173992
GO:0060548	negative regulation of cell death	biological_process	0.39789	1	287	34	20542	102173992
GO:0061136	regulation of proteasomal protein catabolic process	biological_process	0.39858	1	287	35	20542	102170846
GO:1903050	regulation of proteolysis involved in cellular protein catabolic process	biological_process	0.39858	1	287	35	20542	102170846
GO:1903362	regulation of cellular protein catabolic process	biological_process	0.39858	1	287	35	20542	102170846
GO:0004620	phospholipase activity	molecular_function	0.39876	1	287	32	20542	102190639
GO:0000145	exocyst	cellular_component	0.39888	1	287	33	20542	102172616
GO:0001539	cilium or flagellum-dependent cell motility	biological_process	0.399	1	287	35	20542	102171645
GO:0097588	archaeal or bacterial-type flagellum-dependent cell motility	biological_process	0.399	1	287	35	20542	102171645
GO:0015031	protein transport	biological_process	0.40006	12	287	731	20542	102187396,102169825,102188410,102179863,102186276,102189849,102181071,102173962,102172287,102172470,108635007,102188823
GO:0022603	regulation of anatomical structure morphogenesis	biological_process	0.40117	1	287	33	20542	108637147
GO:0008200	ion channel inhibitor activity	molecular_function	0.40272	2	287	94	20542	102170735,102172653
GO:0016248	channel inhibitor activity	molecular_function	0.40272	2	287	94	20542	102170735,102172653
GO:0004713	protein tyrosine kinase activity	molecular_function	0.40459	1	287	34	20542	102184810
GO:0005839	proteasome core complex	cellular_component	0.40722	1	287	38	20542	102172616
GO:0098772	molecular function regulator	molecular_function	0.4074	11	287	674	20542	102178021,102172653,108634545,102170793,102184845,102172450,102169858,102170735,102171106,102168282,102173436
GO:0098800	inner mitochondrial membrane protein complex	cellular_component	0.40774	2	287	105	20542	102180611,102191313
GO:0005230	extracellular ligand-gated ion channel activity	molecular_function	0.40824	2	287	92	20542	102185309,102179313
GO:0048878	chemical homeostasis	biological_process	0.411	2	287	108	20542	108633376,108633422
GO:0006633	fatty acid biosynthetic process	biological_process	0.41104	1	287	36	20542	102178200
GO:1901135	carbohydrate derivative metabolic process	biological_process	0.41171	9	287	557	20542	102180994,102191831,108637349,100861310,106504013,102191313,102185858,102178021,102189372
GO:0016888	endodeoxyribonuclease activity, producing 5'-phosphomonoesters	molecular_function	0.41195	1	287	35	20542	102184810
GO:0019684	photosynthesis, light reaction	biological_process	0.41297	1	287	35	20542	102185858
GO:0071949	FAD binding	molecular_function	0.41333	1	287	35	20542	102189681
GO:0005215	transporter activity	molecular_function	0.41358	26	287	1666	20542	102186512,102174895,102170261,102189772,102186504,102175177,102187396,102188823,102178936,100750232,102179783,108635491,102191076,100861292,106502661,102186276,102179313,102185309,102171391,102168759,100861026,102173224,102173685,102180391,102168606,102185895
GO:0031966	mitochondrial membrane	cellular_component	0.4137	4	287	237	20542	102185309,102191831,102180611,102191313
GO:0065009	regulation of molecular function	biological_process	0.41415	3	287	158	20542	102173992,102170846,102184374
GO:0010948	negative regulation of cell cycle process	biological_process	0.41677	1	287	37	20542	102170846
GO:0044257	cellular protein catabolic process	biological_process	0.41695	3	287	167	20542	102172616,102183790,102170846
GO:0051603	proteolysis involved in cellular protein catabolic process	biological_process	0.41695	3	287	167	20542	102172616,102183790,102170846
GO:0000281	mitotic cytokinesis	biological_process	0.41701	2	287	97	20542	102174369,102187922
GO:0061640	cytoskeleton-dependent cytokinesis	biological_process	0.41701	2	287	97	20542	102174369,102187922
GO:0009110	vitamin biosynthetic process	biological_process	0.41752	1	287	36	20542	102172052
GO:0042364	water-soluble vitamin biosynthetic process	biological_process	0.41752	1	287	36	20542	102172052
GO:0044802	single-organism membrane organization	biological_process	0.41949	3	287	161	20542	102187396,102184374,102189849
GO:0016628	oxidoreductase activity, acting on the CH-CH group of donors, NAD or NADP as acceptor	molecular_function	0.42076	1	287	37	20542	102189681
GO:0016579	protein deubiquitination	biological_process	0.4209	2	287	104	20542	102168955,102187396
GO:0070646	protein modification by small protein removal	biological_process	0.4209	2	287	104	20542	102168955,102187396
GO:0019898	extrinsic component of membrane	cellular_component	0.42187	2	287	100	20542	102177296,102169858
GO:0016667	oxidoreductase activity, acting on a sulfur group of donors	molecular_function	0.42228	3	287	165	20542	102171485,102189594,102182653
GO:0042611	MHC protein complex	cellular_component	0.4235	1	287	39	20542	102189356
GO:0042613	MHC class II protein complex	cellular_component	0.4235	1	287	39	20542	102189356
GO:0031400	negative regulation of protein modification process	biological_process	0.42428	1	287	37	20542	102170846
GO:0051304	chromosome separation	biological_process	0.4255	1	287	38	20542	102170846
GO:0043624	cellular protein complex disassembly	biological_process	0.42573	1	287	39	20542	102169433
GO:0006721	terpenoid metabolic process	biological_process	0.42604	1	287	37	20542	102189681
GO:0016114	terpenoid biosynthetic process	biological_process	0.42604	1	287	37	20542	102189681
GO:0051240	positive regulation of multicellular organismal process	biological_process	0.42625	1	287	37	20542	102172287
GO:0006766	vitamin metabolic process	biological_process	0.42672	1	287	37	20542	102172052
GO:0006767	water-soluble vitamin metabolic process	biological_process	0.42672	1	287	37	20542	102172052
GO:0051087	chaperone binding	molecular_function	0.42846	1	287	38	20542	102170793
GO:0007088	regulation of mitotic nuclear division	biological_process	0.42855	1	287	38	20542	102170846
GO:0019725	cellular homeostasis	biological_process	0.4291	3	287	175	20542	108633422,108633376,102189594
GO:0045184	establishment of protein localization	biological_process	0.43037	12	287	748	20542	102181071,102189849,102186276,102172287,102173962,102169825,102187396,102179863,102188410,108635007,102188823,102172470
GO:0031300	intrinsic component of organelle membrane	cellular_component	0.43092	2	287	100	20542	102169825,102179863
GO:0031301	integral component of organelle membrane	cellular_component	0.43092	2	287	100	20542	102169825,102179863
GO:0016247	channel regulator activity	molecular_function	0.43213	2	287	100	20542	102172653,102170735
GO:0098803	respiratory chain complex	cellular_component	0.43517	1	287	44	20542	102180611
GO:0000070	mitotic sister chromatid segregation	biological_process	0.43636	1	287	39	20542	102170846
GO:0000819	sister chromatid segregation	biological_process	0.43636	1	287	39	20542	102170846
GO:0055114	oxidation-reduction process	biological_process	0.43725	19	287	1231	20542	102191831,102174606,102169617,102182653,102186987,102181032,102189751,102184272,102189372,102174710,102179682,106504013,102174989,102189594,102189681,102182991,102171485,106503257,102185641
GO:0044770	cell cycle phase transition	biological_process	0.43757	1	287	39	20542	102170846
GO:0044772	mitotic cell cycle phase transition	biological_process	0.43757	1	287	39	20542	102170846
GO:1901987	regulation of cell cycle phase transition	biological_process	0.43757	1	287	39	20542	102170846
GO:1901990	regulation of mitotic cell cycle phase transition	biological_process	0.43757	1	287	39	20542	102170846
GO:0051783	regulation of nuclear division	biological_process	0.43757	1	287	39	20542	102170846
GO:0019842	vitamin binding	molecular_function	0.43808	1	287	39	20542	102174606
GO:0006996	organelle organization	biological_process	0.4382	17	287	1103	20542	102169433,102189849,102169933,102177456,102186482,102191317,100860761,108636774,102186276,106502661,102182015,102178163,108634456,108637113,102184459,102179716,102170846
GO:0016151	nickel cation binding	molecular_function	0.43961	3	287	168	20542	102183434,102182887,108634545
GO:0017004	cytochrome complex assembly	biological_process	0.44439	1	287	39	20542	102186482
GO:0004970	ionotropic glutamate receptor activity	molecular_function	0.44516	1	287	39	20542	102179313
GO:0008066	glutamate receptor activity	molecular_function	0.44516	1	287	39	20542	102179313
GO:0090407	organophosphate biosynthetic process	biological_process	0.44573	5	287	309	20542	102191313,102180994,102185858,102171985,108637349
GO:0009966	regulation of signal transduction	biological_process	0.44639	4	287	228	20542	102184845,102184810,102171008,102183492
GO:0072330	monocarboxylic acid biosynthetic process	biological_process	0.44689	1	287	40	20542	102178200
GO:0019954	asexual reproduction	biological_process	0.44737	2	287	103	20542	102174369,102187922
GO:0004857	enzyme inhibitor activity	molecular_function	0.45067	4	287	238	20542	102172450,102168282,102171106,102178021
GO:0006304	DNA modification	biological_process	0.45105	1	287	41	20542	102184810
GO:0007346	regulation of mitotic cell cycle	biological_process	0.45386	1	287	41	20542	102170846
GO:0036459	ubiquitinyl hydrolase activity	molecular_function	0.45463	2	287	111	20542	102168955,102187396
GO:0006779	porphyrin-containing compound biosynthetic process	biological_process	0.45559	1	287	40	20542	102189681
GO:0008064	regulation of actin polymerization or depolymerization	biological_process	0.45711	1	287	44	20542	102169433
GO:0008154	actin polymerization or depolymerization	biological_process	0.45711	1	287	44	20542	102169433
GO:0030041	actin filament polymerization	biological_process	0.45711	1	287	44	20542	102169433
GO:0030832	regulation of actin filament length	biological_process	0.45711	1	287	44	20542	102169433
GO:0030833	regulation of actin filament polymerization	biological_process	0.45711	1	287	44	20542	102169433
GO:0032535	regulation of cellular component size	biological_process	0.45711	1	287	44	20542	102169433
GO:0032956	regulation of actin cytoskeleton organization	biological_process	0.45711	1	287	44	20542	102169433
GO:0032970	regulation of actin filament-based process	biological_process	0.45711	1	287	44	20542	102169433
GO:0004519	endonuclease activity	molecular_function	0.45845	3	287	177	20542	102184810,102174830,102169786
GO:0030054	cell junction	cellular_component	0.45971	1	287	42	20542	102184810
GO:0009308	amine metabolic process	biological_process	0.46049	2	287	107	20542	102187396,102182991
GO:0005272	sodium channel activity	molecular_function	0.46136	1	287	42	20542	100861026
GO:0016893	endonuclease activity, active with either ribo- or deoxyribonucleic acids and producing 5'-phosphomonoesters	molecular_function	0.46227	2	287	109	20542	102184810,102169786
GO:0044765	single-organism transport	biological_process	0.46248	33	287	2172	20542	100861292,102191076,102182991,102186276,102171391,100861026,102172653,102177558,102180391,102168606,102185895,102186512,102172287,102189772,102174895,102170261,102189849,102187396,102175177,102188823,108633345,102185309,102168759,102173224,102173685,102168637,102186482,102186504,102179783,108635491,100750232,102172470,102172616
GO:0010646	regulation of cell communication	biological_process	0.46373	4	287	233	20542	102171008,102184810,102184845,102183492
GO:0044281	small molecule metabolic process	biological_process	0.4644	13	287	857	20542	102174367,102180994,102172052,108637349,102191831,102178168,102178200,106504013,102189681,102191313,102185858,102179779,102189372
GO:0044702	single organism reproductive process	biological_process	0.46489	3	287	179	20542	102174835,102181244,106502552
GO:0007409	axonogenesis	biological_process	0.46509	1	287	43	20542	102172234
GO:0007411	axon guidance	biological_process	0.46509	1	287	43	20542	102172234
GO:0048667	cell morphogenesis involved in neuron differentiation	biological_process	0.46509	1	287	43	20542	102172234
GO:0048812	neuron projection morphogenesis	biological_process	0.46509	1	287	43	20542	102172234
GO:0061564	axon development	biological_process	0.46509	1	287	43	20542	102172234
GO:0097485	neuron projection guidance	biological_process	0.46509	1	287	43	20542	102172234
GO:0000902	cell morphogenesis	biological_process	0.46823	2	287	109	20542	102173394,102172234
GO:0032989	cellular component morphogenesis	biological_process	0.46823	2	287	109	20542	102172234,102173394
GO:0023051	regulation of signaling	biological_process	0.47072	4	287	236	20542	102184845,102171008,102184810,102183492
GO:0010506	regulation of autophagy	biological_process	0.4724	2	287	106	20542	102178163,102171391
GO:0007067	mitotic nuclear division	biological_process	0.4748	2	287	109	20542	108634456,102170846
GO:0000910	cytokinesis	biological_process	0.47589	2	287	109	20542	102174369,102187922
GO:0051338	regulation of transferase activity	biological_process	0.47663	1	287	44	20542	102170846
GO:0044271	cellular nitrogen compound biosynthetic process	biological_process	0.48014	53	287	3785	20542	102187701,102174549,102169933,102181246,102171985,106502612,102185438,102173343,102188823,102191831,102190936,102174369,102179804,102168282,102172910,102176501,100861358,102191313,102185858,102179779,102169746,102176620,102181755,102170574,102174367,102178640,108634456,102190639,102188324,102170846,106503454,102187922,106503606,102189681,102181452,102170196,102180994,108637349,102172052,102178168…
GO:0008047	enzyme activator activity	molecular_function	0.48322	2	287	109	20542	102170793,108634545
GO:0071822	protein complex subunit organization	biological_process	0.48644	9	287	603	20542	102177456,102186482,106502661,102184810,102169433,102169933,102180907,108634456,102178163
GO:0005746	mitochondrial respiratory chain	cellular_component	0.49062	1	287	52	20542	102180611
GO:0005740	mitochondrial envelope	cellular_component	0.49106	4	287	262	20542	102185309,102191831,102191313,102180611
GO:0043226	organelle	cellular_component	0.49357	59	287	4235	20542	102171645,102180611,102169433,102186482,102181452,102179783,102181899,102183601,102185100,102188426,102173754,102172616,102171867,102183123,102173992,102171485,108633345,106502661,102185309,102177425,102181384,102184982,102178163,102173281,102180885,106504013,102169933,102181246,108637376,106502612,102185438,102172879,102187701,102174549,102179863,102172912,102187396,102172855,102191831,102189598…
GO:0043229	intracellular organelle	cellular_component	0.49413	58	287	4168	20542	102179783,102181899,102183601,102185100,102188426,102173754,102171867,102172616,102169433,102180611,102186482,102181452,102177425,102181384,102178163,102184982,102173281,102180885,106504013,102183123,102173992,102171485,108633345,106502661,102185309,102172855,102189598,102191831,102188188,102176501,102175861,102174369,102181246,102169933,102185438,108637376,106502612,102172879,102187701,102174549…
GO:0000075	cell cycle checkpoint	biological_process	0.49592	1	287	47	20542	102170846
GO:0065008	regulation of biological quality	biological_process	0.49614	9	287	601	20542	102187638,108633376,102189594,102189849,108636774,102171485,102169433,102172287,108633422
GO:0051641	cellular localization	biological_process	0.49787	14	287	921	20542	102169825,102187396,102185309,102188410,102186482,102189849,102181071,102186276,108636774,102171485,102173962,102187638,102172616,108635007
GO:0043241	protein complex disassembly	biological_process	0.49811	1	287	49	20542	102169433
GO:0051302	regulation of cell division	biological_process	0.50029	1	287	47	20542	102170846
GO:0019207	kinase regulator activity	molecular_function	0.50212	1	287	48	20542	102169858
GO:0019953	sexual reproduction	biological_process	0.50423	3	287	187	20542	106502552,102181244,102174835
GO:0044703	multi-organism reproductive process	biological_process	0.50423	3	287	187	20542	106502552,102181244,102174835
GO:0034655	nucleobase-containing compound catabolic process	biological_process	0.50506	1	287	47	20542	102189849
GO:0006810	transport	biological_process	0.50521	42	287	2823	20542	108633345,102181071,102168759,102185309,102173224,102173685,102178163,108635007,102174981,102168637,102186482,102186504,108635491,102179783,100750232,102172470,102172616,100861292,102173962,102191076,102182991,102186276,102171391,100861026,102172653,102169825,102177558,102180391,102168606,102185895,102169933,102186512,102172287,102189772,102174895,102189849,102170261,102188410,102179863,102187396…
GO:0016298	lipase activity	molecular_function	0.50536	1	287	45	20542	102190639
GO:0004536	deoxyribonuclease activity	molecular_function	0.50567	3	287	182	20542	102184374,102189229,102184810
GO:0032984	macromolecular complex disassembly	biological_process	0.50604	1	287	50	20542	102169433
GO:0060590	ATPase regulator activity	molecular_function	0.51023	1	287	49	20542	102170793
GO:1990204	oxidoreductase complex	cellular_component	0.51028	1	287	53	20542	102180611
GO:0000003	reproduction	biological_process	0.51218	5	287	325	20542	102174835,102174369,102187922,102181244,106502552
GO:0031175	neuron projection development	biological_process	0.51322	1	287	49	20542	102172234
GO:0048666	neuron development	biological_process	0.51322	1	287	49	20542	102172234
GO:0000904	cell morphogenesis involved in differentiation	biological_process	0.51383	1	287	49	20542	102172234
GO:0004518	nuclease activity	molecular_function	0.51444	6	287	395	20542	102187147,102184374,102169786,102189229,102174830,102184810
GO:0005753	mitochondrial proton-transporting ATP synthase complex	cellular_component	0.51684	1	287	53	20542	102191313
GO:0022843	voltage-gated cation channel activity	molecular_function	0.51797	2	287	115	20542	102179783,102186504
GO:0034508	centromere complex assembly	biological_process	0.51902	1	287	50	20542	108634456
GO:0016638	oxidoreductase activity, acting on the CH-NH2 group of donors	molecular_function	0.52115	1	287	49	20542	102182991
GO:0022411	cellular component disassembly	biological_process	0.52152	1	287	52	20542	102169433
GO:0051234	establishment of localization	biological_process	0.52184	42	287	2840	20542	102169825,102177558,100861026,102172653,102171391,102186276,102182991,102191076,102173962,100861292,102185895,102168606,102180391,102187396,102175177,102179863,102188410,102174895,102189849,102170261,102189772,102186512,102172287,102169933,102188823,102185309,102168759,102181071,108633345,102174981,108635007,102178163,102173224,102173685,102186504,102186482,102168637,102172616,102172470,100750232…
GO:0010558	negative regulation of macromolecule biosynthetic process	biological_process	0.52226	1	287	51	20542	102191313
GO:0031327	negative regulation of cellular biosynthetic process	biological_process	0.52226	1	287	51	20542	102191313
GO:0051172	negative regulation of nitrogen compound metabolic process	biological_process	0.52226	1	287	51	20542	102191313
GO:2000113	negative regulation of cellular macromolecule biosynthetic process	biological_process	0.52226	1	287	51	20542	102191313
GO:0016903	oxidoreductase activity, acting on the aldehyde or oxo group of donors	molecular_function	0.52317	1	287	54	20542	102182852
GO:0031410	cytoplasmic vesicle	cellular_component	0.52319	2	287	117	20542	102173394,102185858
GO:0009288	bacterial-type flagellum	cellular_component	0.52353	1	287	51	20542	102171645
GO:0016469	proton-transporting two-sector ATPase complex	cellular_component	0.52391	3	287	197	20542	102191313,102171391,102168606
GO:0046872	metal ion binding	molecular_function	0.52494	52	287	3537	20542	102179715,102183554,102168637,102189372,102183648,102170196,102169720,102168955,102179783,102180994,108637349,102182887,102173630,102171867,102178589,102178200,102182980,108633376,102189774,108633422,102178163,108636357,102179682,100860911,102180885,102189594,102169849,102189849,102169933,102185438,102184845,102175068,102191474,102188188,102179804,102171989,102172910,102186607,102182991,108634545…
GO:0051028	mRNA transport	biological_process	0.52575	1	287	48	20542	102186482
GO:0004540	ribonuclease activity	molecular_function	0.52642	2	287	123	20542	102174830,102169786
GO:0070469	respiratory chain	cellular_component	0.52679	1	287	57	20542	102180611
GO:0010564	regulation of cell cycle process	biological_process	0.52691	1	287	51	20542	102170846
GO:0031982	vesicle	cellular_component	0.52763	2	287	118	20542	102173394,102185858
GO:0015988	energy coupled proton transmembrane transport, against electrochemical gradient	biological_process	0.52957	2	287	124	20542	102171391,102168606
GO:0015991	ATP hydrolysis coupled proton transport	biological_process	0.52957	2	287	124	20542	102171391,102168606
GO:0043565	sequence-specific DNA binding	molecular_function	0.53135	8	287	546	20542	102189598,102172910,102190985,102185438,102170213,102171485,106502661,102173343
GO:0030182	neuron differentiation	biological_process	0.53209	1	287	52	20542	102172234
GO:0048699	generation of neurons	biological_process	0.53209	1	287	52	20542	102172234
GO:0006413	translational initiation	biological_process	0.53273	1	287	55	20542	102191313
GO:0045786	negative regulation of cell cycle	biological_process	0.53316	1	287	52	20542	102170846
GO:0048522	positive regulation of cellular process	biological_process	0.53438	5	287	336	20542	102172287,102178163,102171391,108637147,102170196
GO:0010876	lipid localization	biological_process	0.53481	2	287	122	20542	102188823,102172287
GO:0016765	transferase activity, transferring alkyl or aryl (other than methyl) groups	molecular_function	0.53551	1	287	51	20542	102178861
GO:0004520	endodeoxyribonuclease activity	molecular_function	0.53692	1	287	51	20542	102184810
GO:0032271	regulation of protein polymerization	biological_process	0.53725	1	287	55	20542	102169433
GO:0043254	regulation of protein complex assembly	biological_process	0.53725	1	287	55	20542	102169433
GO:0010629	negative regulation of gene expression	biological_process	0.53725	1	287	53	20542	102191313
GO:0005856	cytoskeleton	cellular_component	0.53804	8	287	556	20542	102178163,102188188,102176043,102172616,106504013,102169433,106502661,102171391
GO:0022008	neurogenesis	biological_process	0.53945	1	287	53	20542	102172234
GO:0044429	mitochondrial part	cellular_component	0.54002	4	287	279	20542	102185309,102191313,102180611,102191831
GO:0034645	cellular macromolecule biosynthetic process	biological_process	0.54015	53	287	3842	20542	102180081,102178168,102185100,102188426,102181452,102170196,102184982,102173281,102173685,102177425,102181384,102180885,102189594,102170213,106502661,102183123,102185309,102188823,102172855,102191831,102174369,102190936,102179804,102168282,102176501,102172910,102175861,102187701,102174549,102172879,102181246,102169933,102171985,106502612,102185438,102173343,102181755,102174367,102170574,102188324…
GO:0043169	cation binding	molecular_function	0.54039	52	287	3555	20542	102188188,102179804,102172910,102171989,102169849,102189849,102169933,102185438,102184845,102175068,102191474,102174710,102190639,102176431,102187922,102183434,102186607,102182991,108634545,102174296,102179779,102178363,102191817,102169825,102169746,102180048,102179783,102180994,108637349,102173630,102182887,102171867,102178589,102178200,102182980,108633376,102179715,102168637,102183554,102189372…
GO:0009890	negative regulation of biosynthetic process	biological_process	0.54048	1	287	54	20542	102191313
GO:0019028	viral capsid	cellular_component	0.54062	6	287	402	20542	102176043,102173630,102181634,102174369,102171391,102188410
GO:0042626	ATPase activity, coupled to transmembrane movement of substances	molecular_function	0.54305	2	287	122	20542	102185895,106502661
GO:0043492	ATPase activity, coupled to movement of substances	molecular_function	0.54305	2	287	122	20542	102185895,106502661
GO:0030955	potassium ion binding	molecular_function	0.54644	1	287	52	20542	102179783
GO:0031420	alkali metal ion binding	molecular_function	0.54644	1	287	52	20542	102179783
GO:0007399	nervous system development	biological_process	0.54673	1	287	54	20542	102172234
GO:0033177	proton-transporting two-sector ATPase complex, proton-transporting domain	cellular_component	0.54814	2	287	133	20542	102171391,102168606
GO:0000377	RNA splicing, via transesterification reactions with bulged adenosine as nucleophile	biological_process	0.55056	1	287	55	20542	102187396
GO:0000398	mRNA splicing, via spliceosome	biological_process	0.55056	1	287	55	20542	102187396
GO:0098798	mitochondrial protein complex	cellular_component	0.55348	2	287	136	20542	102191313,102180611
GO:0046148	pigment biosynthetic process	biological_process	0.5539	1	287	53	20542	102189681
GO:0022414	reproductive process	biological_process	0.55627	3	287	203	20542	106502552,102181244,102174835
GO:0015698	inorganic anion transport	biological_process	0.56044	1	287	55	20542	100750232
GO:0070647	protein modification by small protein conjugation or removal	biological_process	0.56083	3	287	204	20542	102187396,102168955,102170846
GO:0003899	DNA-directed RNA polymerase activity	molecular_function	0.56119	3	287	199	20542	102181452,102179804,102168282
GO:0032990	cell part morphogenesis	biological_process	0.56256	1	287	57	20542	102172234
GO:0048858	cell projection morphogenesis	biological_process	0.56256	1	287	57	20542	102172234
GO:0006928	movement of cell or subcellular component	biological_process	0.56783	4	287	268	20542	102172234,102180081,102171645,102188823
GO:0015399	primary active transmembrane transporter activity	molecular_function	0.5702	2	287	128	20542	102185895,106502661
GO:0015405	P-P-bond-hydrolysis-driven transmembrane transporter activity	molecular_function	0.5702	2	287	128	20542	106502661,102185895
GO:0006022	aminoglycan metabolic process	biological_process	0.57142	1	287	55	20542	102178021
GO:0008855	exodeoxyribonuclease VII activity	molecular_function	0.57184	2	287	130	20542	102189229,102184374
GO:0001071	nucleic acid binding transcription factor activity	molecular_function	0.5721	12	287	841	20542	102170846,102181755,102190639,102172910,102174369,102187922,102179779,102185438,102170213,106502661,102176620,102173343
GO:0003700	transcription factor activity, sequence-specific DNA binding	molecular_function	0.5721	12	287	841	20542	102181755,102190639,102170846,102174369,102187922,102172910,102170213,106502661,102179779,102185438,102173343,102176620
GO:0034622	cellular macromolecular complex assembly	biological_process	0.5723	6	287	432	20542	102186482,106502661,108634456,102184810,102169433,102178163
GO:0009059	macromolecule biosynthetic process	biological_process	0.57285	53	287	3879	20542	102188823,102172855,102191831,102174369,102190936,102179804,102168282,102175861,102172910,102176501,102187701,102174549,102172879,102181246,102171985,102169933,106502612,102185438,102173343,102174367,102181755,102170574,102188324,108634456,102190639,102178640,100861310,106503454,102170846,102187922,106503606,102191313,100861358,102179779,102169746,102176620,102180081,102178168,102185100,102188426…
GO:0016310	phosphorylation	biological_process	0.57543	11	287	757	20542	106504013,100861158,102188484,102191317,102191831,102180282,102189372,102177453,102171047,102184810,102184414
GO:0031325	positive regulation of cellular metabolic process	biological_process	0.57559	3	287	205	20542	102178163,102171391,102170196
GO:0006403	RNA localization	biological_process	0.57574	1	287	55	20542	102186482
GO:0050657	nucleic acid transport	biological_process	0.57574	1	287	55	20542	102186482
GO:0050658	RNA transport	biological_process	0.57574	1	287	55	20542	102186482
GO:0051236	establishment of RNA localization	biological_process	0.57574	1	287	55	20542	102186482
GO:0044087	regulation of cellular component biogenesis	biological_process	0.57637	1	287	61	20542	102169433
GO:0016491	oxidoreductase activity	molecular_function	0.5766	19	287	1336	20542	102182991,102171485,102185641,102174710,102182852,102179682,102189681,102189594,106504013,102174989,102184272,102181032,102189751,102189372,102191831,102174606,102169617,102186987,102182653
GO:0008017	microtubule binding	molecular_function	0.57719	2	287	128	20542	102180081,102188823
GO:0000375	RNA splicing, via transesterification reactions	biological_process	0.57827	1	287	59	20542	102187396
GO:0004529	exodeoxyribonuclease activity	molecular_function	0.58075	2	287	132	20542	102184374,102189229
GO:0016895	exodeoxyribonuclease activity, producing 5'-phosphomonoesters	molecular_function	0.58075	2	287	132	20542	102184374,102189229
GO:0004252	serine-type endopeptidase activity	molecular_function	0.58416	4	287	282	20542	102173343,102176878,102171391,108633175
GO:0044255	cellular lipid metabolic process	biological_process	0.58634	4	287	276	20542	102189681,108634151,102178200,102178496
GO:0090066	regulation of anatomical structure size	biological_process	0.58744	1	287	62	20542	102169433
GO:0048583	regulation of response to stimulus	biological_process	0.5878	4	287	277	20542	102183492,102184845,102184810,102171008
GO:0008610	lipid biosynthetic process	biological_process	0.58782	3	287	208	20542	102178496,102178200,102189681
GO:0033043	regulation of organelle organization	biological_process	0.58833	2	287	138	20542	102169433,102170846
GO:0061695	transferase complex, transferring phosphorus-containing groups	cellular_component	0.58837	2	287	141	20542	102169858,102170574
GO:0006807	nitrogen compound metabolic process	biological_process	0.58902	75	287	5431	20542	102183123,106502661,102170213,102189594,106504013,102173685,102173281,102170196,102181452,102189894,102189372,102183790,102183554,102172052,102180994,102180081,102179779,102189681,106503606,106503454,102170846,102178640,108634456,102174367,102170574,102173343,102187396,108637376,106502612,102171985,102181246,102189849,102172879,102174549,102187701,102176501,102190936,102174369,102185309,102178021…
GO:0031967	organelle envelope	cellular_component	0.58961	4	287	293	20542	102180611,102191313,102191831,102185309
GO:0061024	membrane organization	biological_process	0.58998	3	287	207	20542	102189849,102184374,102187396
GO:0008173	RNA methyltransferase activity	molecular_function	0.59061	1	287	60	20542	102187196
GO:0051188	cofactor biosynthetic process	biological_process	0.59212	2	287	136	20542	102189681,102171985
GO:0015931	nucleobase-containing compound transport	biological_process	0.59239	1	287	58	20542	102186482
GO:0010256	endomembrane system organization	biological_process	0.59406	1	287	60	20542	102184374
GO:0044430	cytoskeletal part	cellular_component	0.59801	7	287	516	20542	102171391,102172616,102169433,102188188,102178163,102176043,106502661
GO:0033993	response to lipid	biological_process	0.59807	1	287	59	20542	102185438
GO:0043401	steroid hormone mediated signaling pathway	biological_process	0.59807	1	287	59	20542	102185438
GO:0048545	response to steroid hormone	biological_process	0.59807	1	287	59	20542	102185438
GO:0071383	cellular response to steroid hormone stimulus	biological_process	0.59807	1	287	59	20542	102185438
GO:0071396	cellular response to lipid	biological_process	0.59807	1	287	59	20542	102185438
GO:0071407	cellular response to organic cyclic compound	biological_process	0.59807	1	287	59	20542	102185438
GO:1902589	single-organism organelle organization	biological_process	0.5981	7	287	498	20542	108634456,102189849,108636774,102169433,102170846,102169933,102177456
GO:0010941	regulation of cell death	biological_process	0.60275	2	287	139	20542	102173992,102171047
GO:0042981	regulation of apoptotic process	biological_process	0.60275	2	287	139	20542	102173992,102171047
GO:0043067	regulation of programmed cell death	biological_process	0.60275	2	287	139	20542	102171047,102173992
GO:0010467	gene expression	biological_process	0.6029	54	287	3984	20542	102168282,102172910,102176501,102190936,102174369,102179804,102188823,102191831,102187396,102173343,102171985,102169933,102181246,108637376,106502612,102185438,102187701,102174549,106503606,102187922,102190985,106503454,102170846,102174367,102170574,102181755,102190639,108634456,102178640,102188324,102176620,102169746,102179779,102191313,100861358,102185100,102188426,102178168,102174830,102186482…
GO:0006812	cation transport	biological_process	0.60427	11	287	783	20542	102179783,102173685,102168606,102174895,102186276,102189772,102168637,102187396,100861026,102175177,102171391
GO:0044249	cellular biosynthetic process	biological_process	0.60549	60	287	4411	20542	106502661,102170213,102183123,102185309,102173281,102184982,102181384,102173685,102177425,102189594,102180885,102170196,102181452,102180994,102180081,108637349,102178168,102178496,102172052,102178200,102188426,102185100,100861358,102191313,102179779,102185858,102169746,102176620,108634456,102178640,102190639,102188324,102170574,102181755,102174367,106503454,102170846,100861310,102187922,102189681…
GO:0033179	proton-transporting V-type ATPase, V0 domain	cellular_component	0.60637	1	287	65	20542	102171391
GO:0044455	mitochondrial membrane part	cellular_component	0.60768	2	287	150	20542	102180611,102191313
GO:1901681	sulfur compound binding	molecular_function	0.61011	1	287	64	20542	100860957
GO:0008236	serine-type peptidase activity	molecular_function	0.6103	5	287	363	20542	102171391,108633175,102183492,102173343,102176878
GO:0017171	serine hydrolase activity	molecular_function	0.6103	5	287	363	20542	108633175,102171391,102183492,102173343,102176878
GO:0033178	proton-transporting two-sector ATPase complex, catalytic domain	cellular_component	0.61046	1	287	64	20542	102191313
GO:0009893	positive regulation of metabolic process	biological_process	0.61209	3	287	216	20542	102178163,102170196,102171391
GO:0006887	exocytosis	biological_process	0.61278	1	287	64	20542	102172616
GO:0006778	porphyrin-containing compound metabolic process	biological_process	0.61279	1	287	64	20542	102189681
GO:0012505	endomembrane system	cellular_component	0.61384	7	287	500	20542	108633345,102178640,102181899,102178163,102173992,102179863,102169825
GO:0031399	regulation of protein modification process	biological_process	0.61485	1	287	64	20542	102170846
GO:0060589	nucleoside-triphosphatase regulator activity	molecular_function	0.61624	2	287	141	20542	102170793,108634545
GO:0006886	intracellular protein transport	biological_process	0.61853	8	287	570	20542	108635007,102173962,102181071,102189849,102186276,102188410,102187396,102169825
GO:0051260	protein homooligomerization	biological_process	0.62018	1	287	64	20542	102180907
GO:0000280	nuclear division	biological_process	0.62183	2	287	142	20542	102170846,108634456
GO:0050793	regulation of developmental process	biological_process	0.62278	1	287	64	20542	108637147
GO:0008146	sulfotransferase activity	molecular_function	0.62558	1	287	63	20542	102174310
GO:0048518	positive regulation of biological process	biological_process	0.62604	5	287	373	20542	102171391,102170196,108637147,102172287,102178163
GO:0009152	purine ribonucleotide biosynthetic process	biological_process	0.62622	2	287	149	20542	102191313,102185858
GO:0043167	ion binding	molecular_function	0.62969	80	287	5571	20542	102179804,102188484,102171989,102172910,102188188,102188823,102180282,102175068,102191474,102169849,102169933,102185438,102187922,102176431,102185895,102183434,100861158,102190639,102169746,102182991,102191313,108634545,102184810,102174296,102181151,102178200,102171867,102172470,108633376,102179783,108637349,102182887,102178168,102183648,102178331,102168955,102168637,100860957,102180885,108636357…
GO:0034641	cellular nitrogen compound metabolic process	biological_process	0.63252	71	287	5212	20542	102180994,102180081,102172052,102170196,102181452,102189894,102189372,102183790,106504013,102189594,102173281,102173685,106502661,102170213,102183123,102190936,102174369,102176501,102173343,102187396,102174549,102189849,102172879,102187701,108637376,106502612,102171985,102181246,102189681,106503606,108634456,102178640,102174367,102170574,102170846,106503454,102179779,102188426,102185100,102174830…
GO:0016043	cellular component organization	biological_process	0.63615	25	287	1817	20542	102184459,102179716,102170846,102178163,108637113,108634456,102187922,102180907,108636774,106502661,102186276,102184810,102182015,102173394,102172234,100860761,102191317,102174369,102169933,102169433,102189849,102186482,102187396,102177456,102184374
GO:0030001	metal ion transport	biological_process	0.6377	7	287	510	20542	102168637,102179783,102186276,102174895,102187396,102175177,100861026
GO:0009260	ribonucleotide biosynthetic process	biological_process	0.63824	2	287	152	20542	102191313,102185858
GO:0046390	ribose phosphate biosynthetic process	biological_process	0.63824	2	287	152	20542	102191313,102185858
GO:0045259	proton-transporting ATP synthase complex	cellular_component	0.63967	1	287	74	20542	102191313
GO:0031975	envelope	cellular_component	0.63977	4	287	312	20542	102191831,102191313,102180611,102185309
GO:0016020	membrane	cellular_component	0.6412	89	287	6677	20542	102185858,102191313,102180661,102182991,102173394,102172235,102191098,102186367,102177558,102177498,102172653,102173436,102180391,102177694,100861158,102185895,102186512,102174895,102169849,102189772,102179863,102175177,102191831,102188823,102174750,102188188,108637121,102175861,102187638,102169858,108633345,108635388,102185309,102173224,102174981,108636357,102178163,102171917,100860957,102168637…
GO:0014070	response to organic cyclic compound	biological_process	0.64284	1	287	67	20542	102185438
GO:0044459	plasma membrane part	cellular_component	0.64377	3	287	227	20542	108636774,102175861,102189356
GO:0048285	organelle fission	biological_process	0.645	2	287	148	20542	102170846,108634456
GO:0006367	transcription initiation from RNA polymerase II promoter	biological_process	0.64509	1	287	74	20542	100861358
GO:0009755	hormone-mediated signaling pathway	biological_process	0.64516	1	287	68	20542	102185438
GO:0032870	cellular response to hormone stimulus	biological_process	0.64516	1	287	68	20542	102185438
GO:0016891	endoribonuclease activity, producing 5'-phosphomonoesters	molecular_function	0.64576	1	287	74	20542	102169786
GO:0008238	exopeptidase activity	molecular_function	0.64637	2	287	143	20542	102183492,102171917
GO:0019538	protein metabolic process	biological_process	0.64761	46	287	3449	20542	102188426,102185100,102172616,102178168,102182887,102168955,102183790,102171047,102171917,102180885,108633175,102177425,102173281,102177453,102185309,102175805,102176878,102183123,102173992,102188484,102176501,102168282,102180282,102191317,102187396,106502612,102184414,102181246,102171985,102187701,102174549,100861116,102183434,106503606,100861158,106503454,102170846,100861310,102176043,102174367…
GO:0016796	exonuclease activity, active with either ribo- or deoxyribonucleic acids and producing 5'-phosphomonoesters	molecular_function	0.65012	2	287	149	20542	102184374,102189229
GO:0016836	hydro-lyase activity	molecular_function	0.65018	1	287	69	20542	102174606
GO:0070008	serine-type exopeptidase activity	molecular_function	0.65097	1	287	68	20542	102183492
GO:0000041	transition metal ion transport	biological_process	0.65463	2	287	152	20542	102168637,102187396
GO:0008081	phosphoric diester hydrolase activity	molecular_function	0.65655	1	287	69	20542	102190639
GO:0005488	binding	molecular_function	0.65718	172	287	12097	20542	102191317,102175270,102174606,102174369,102187226,102181610,102171405,102171985,108637376,102184845,102173343,108634456,102187803,102177296,102177885,102186607,102180522,102176556,102169825,102180081,102181899,100860761,102173630,102178589,102182980,102185302,102183554,102183790,102169720,102186482,102184459,102173685,102173760,102189594,102191102,102172450,102185756,102185837,108633422,102188188…
GO:0005506	iron ion binding	molecular_function	0.65724	3	287	239	20542	102174710,108633422,108633376
GO:0006164	purine nucleotide biosynthetic process	biological_process	0.65749	2	287	158	20542	102185858,102191313
GO:0046907	intracellular transport	biological_process	0.65823	10	287	736	20542	108635007,102169825,102187396,102188410,102185309,102186482,102189849,102181071,102186276,102173962
GO:0015631	tubulin binding	molecular_function	0.65856	2	287	150	20542	102180081,102188823
GO:0006955	immune response	biological_process	0.65989	4	287	324	20542	108635007,108636774,102189356,102173394
GO:0005739	mitochondrion	cellular_component	0.6619	5	287	399	20542	102191831,102191313,102180611,102186482,102185309
GO:1902531	regulation of intracellular signal transduction	biological_process	0.66255	2	287	147	20542	102171008,102184845
GO:0043933	macromolecular complex subunit organization	biological_process	0.66433	9	287	695	20542	102177456,102186482,106502661,102184810,102169433,102169933,102180907,108634456,102178163
GO:0071495	cellular response to endogenous stimulus	biological_process	0.66664	1	287	72	20542	102185438
GO:0044433	cytoplasmic vesicle part	cellular_component	0.6678	1	287	73	20542	102185858
GO:0019079	viral genome replication	biological_process	0.66905	1	287	73	20542	102173992
GO:1901576	organic substance biosynthetic process	biological_process	0.67006	60	287	4493	20542	102191831,102188823,102172855,102172910,102175861,102176501,102168282,102190936,102179804,102174369,102185438,106502612,102181246,102169933,102171985,102187701,102172879,102174549,102173343,102170846,106503454,100861310,102188324,108634456,102190639,102178640,102170574,102181755,102174367,102189681,106503606,102187922,102185858,102179779,100861358,102191313,102176620,102169746,108637349,102178496…
GO:0016209	antioxidant activity	molecular_function	0.67021	1	287	77	20542	102189751
GO:0015276	ligand-gated ion channel activity	molecular_function	0.67182	2	287	152	20542	102179313,102185309
GO:0022834	ligand-gated channel activity	molecular_function	0.67182	2	287	152	20542	102179313,102185309
GO:0009617	response to bacterium	biological_process	0.67227	1	287	76	20542	102172616
GO:0042742	defense response to bacterium	biological_process	0.67227	1	287	76	20542	102172616
GO:0042440	pigment metabolic process	biological_process	0.67251	1	287	75	20542	102189681
GO:0007275	multicellular organismal development	biological_process	0.67556	4	287	313	20542	102183492,102172234,102179783,102172052
GO:0045454	cell redox homeostasis	biological_process	0.67729	1	287	76	20542	102189594
GO:0033014	tetrapyrrole biosynthetic process	biological_process	0.67846	1	287	75	20542	102189681
GO:0098797	plasma membrane protein complex	cellular_component	0.67867	2	287	161	20542	102189356,108636774
GO:0046700	heterocycle catabolic process	biological_process	0.67944	1	287	77	20542	102189849
GO:0016829	lyase activity	molecular_function	0.67996	4	287	310	20542	102185858,102174606,102177833,108634151
GO:0006461	protein complex assembly	biological_process	0.68062	7	287	554	20542	102178163,102169433,106502661,108634456,102184810,102180907,102186482
GO:0072522	purine-containing compound biosynthetic process	biological_process	0.68102	2	287	165	20542	102191313,102185858
GO:0005044	scavenger receptor activity	molecular_function	0.68128	1	287	74	20542	102177694
GO:0038024	cargo receptor activity	molecular_function	0.68128	1	287	74	20542	102177694
GO:0019012	virion	cellular_component	0.68135	8	287	617	20542	102173630,102176043,102174369,102186164,102170793,102171391,102188410,102181634
GO:0016798	hydrolase activity, acting on glycosyl bonds	molecular_function	0.6823	3	287	239	20542	102172881,102175908,102188128
GO:0070271	protein complex biogenesis	biological_process	0.68252	7	287	555	20542	106502661,108634456,102184810,102169433,102178163,102180907,102186482
GO:0006631	fatty acid metabolic process	biological_process	0.68426	1	287	77	20542	102178200
GO:0045893	positive regulation of transcription, DNA-templated	biological_process	0.685	1	287	81	20542	102170196
GO:0045935	positive regulation of nucleobase-containing compound metabolic process	biological_process	0.685	1	287	81	20542	102170196
GO:0051254	positive regulation of RNA metabolic process	biological_process	0.685	1	287	81	20542	102170196
GO:1902680	positive regulation of RNA biosynthetic process	biological_process	0.685	1	287	81	20542	102170196
GO:1903508	positive regulation of nucleic acid-templated transcription	biological_process	0.685	1	287	81	20542	102170196
GO:0007266	Rho protein signal transduction	biological_process	0.68749	1	287	74	20542	102184845
GO:0035023	regulation of Rho protein signal transduction	biological_process	0.68749	1	287	74	20542	102184845
GO:0044270	cellular nitrogen compound catabolic process	biological_process	0.6895	1	287	79	20542	102189849
GO:0018193	peptidyl-amino acid modification	biological_process	0.68991	1	287	84	20542	102190009
GO:0016772	transferase activity, transferring phosphorus-containing groups	molecular_function	0.69296	23	287	1692	20542	102184810,102171485,102180522,102169746,102177453,102185895,102187196,100861158,102171047,102183790,102184414,102181452,102178331,102191317,102180994,102180081,102178496,108637349,102180282,102172052,102179804,102188484,102168282
GO:0019222	regulation of metabolic process	biological_process	0.69366	33	287	2425	20542	102170196,102181384,102173685,102184982,102178163,102189594,106502661,102173992,102170213,102191831,102188823,102172910,102190936,102179804,102174369,102185438,102171985,102169933,102184374,102173343,102170846,102188324,102178640,102190639,102181755,102187922,102179779,102191313,100861358,102176620,102171391,102169746,102172653
GO:0006754	ATP biosynthetic process	biological_process	0.69404	1	287	85	20542	102191313
GO:0006352	DNA-templated transcription, initiation	biological_process	0.6951	2	287	181	20542	108634456,100861358
GO:0009891	positive regulation of biosynthetic process	biological_process	0.69686	1	287	84	20542	102170196
GO:0010557	positive regulation of macromolecule biosynthetic process	biological_process	0.69686	1	287	84	20542	102170196
GO:0031328	positive regulation of cellular biosynthetic process	biological_process	0.69686	1	287	84	20542	102170196
GO:0051173	positive regulation of nitrogen compound metabolic process	biological_process	0.69686	1	287	84	20542	102170196
GO:0071310	cellular response to organic substance	biological_process	0.69832	1	287	79	20542	102185438
GO:0006796	phosphate-containing compound metabolic process	biological_process	0.69844	17	287	1279	20542	102171047,102184414,102171985,102189372,102180994,102191317,102180282,108637349,102191831,102188484,108634151,102191313,102184810,102185858,102177453,106504013,100861158
GO:0031090	organelle membrane	cellular_component	0.69974	7	287	562	20542	102169825,102185309,102179863,102180611,102173992,102191313,102191831
GO:0051213	dioxygenase activity	molecular_function	0.70152	1	287	83	20542	102185641
GO:0010628	positive regulation of gene expression	biological_process	0.70166	1	287	85	20542	102170196
GO:0016820	hydrolase activity, acting on acid anhydrides, catalyzing transmembrane movement of substances	molecular_function	0.70236	2	287	163	20542	106502661,102185895
GO:0008565	protein transporter activity	molecular_function	0.70257	1	287	82	20542	102188823
GO:0016779	nucleotidyltransferase activity	molecular_function	0.70261	6	287	477	20542	102168282,102179804,102181452,102178496,102172052,102180081
GO:0016782	transferase activity, transferring sulfur-containing groups	molecular_function	0.70396	1	287	80	20542	102174310
GO:0006793	phosphorus metabolic process	biological_process	0.70924	17	287	1288	20542	102189372,102171047,102171985,102184414,102188484,108634151,102191317,102180994,102191831,108637349,102180282,102177453,102184810,102191313,102185858,106504013,100861158
GO:0005667	transcription factor complex	cellular_component	0.70928	1	287	91	20542	102176620
GO:0017038	protein import	biological_process	0.71014	2	287	166	20542	102172287,102172470
GO:1901361	organic cyclic compound catabolic process	biological_process	0.71195	1	287	84	20542	102189849
GO:0019439	aromatic compound catabolic process	biological_process	0.71346	1	287	85	20542	102189849
GO:0042802	identical protein binding	molecular_function	0.71542	2	287	166	20542	102171391,102173284
GO:0065003	macromolecular complex assembly	biological_process	0.71568	7	287	573	20542	102180907,102186482,108634456,102184810,106502661,102178163,102169433
GO:0005088	Ras guanyl-nucleotide exchange factor activity	molecular_function	0.71623	1	287	81	20542	102184845
GO:0005089	Rho guanyl-nucleotide exchange factor activity	molecular_function	0.71623	1	287	81	20542	102184845
GO:0005096	GTPase activator activity	molecular_function	0.7167	1	287	83	20542	108634545
GO:0051649	establishment of localization in cell	biological_process	0.71748	11	287	850	20542	102172616,108635007,102169825,102187396,102186482,102188410,102185309,102189849,102181071,102186276,102173962
GO:0009725	response to hormone	biological_process	0.71881	1	287	83	20542	102185438
GO:0051493	regulation of cytoskeleton organization	biological_process	0.72042	1	287	89	20542	102169433
GO:0008324	cation transmembrane transporter activity	molecular_function	0.72114	11	287	867	20542	102173685,102179783,102168606,102189772,102174895,102186276,102171391,102187396,102175177,100861026,102186504
GO:0006576	cellular biogenic amine metabolic process	biological_process	0.72204	1	287	88	20542	102187396
GO:0044106	cellular amine metabolic process	biological_process	0.72204	1	287	88	20542	102187396
GO:0016835	carbon-oxygen lyase activity	molecular_function	0.72483	1	287	85	20542	102174606
GO:0009108	coenzyme biosynthetic process	biological_process	0.72517	1	287	89	20542	102171985
GO:0032879	regulation of localization	biological_process	0.72937	1	287	87	20542	102172287
GO:0031323	regulation of cellular metabolic process	biological_process	0.73357	31	287	2326	20542	102173343,102170196,102171985,102169933,102185438,102179804,102190936,102174369,102172910,102188823,102191831,102169746,102176620,102171391,102170213,102173992,106502661,102191313,100861358,102179779,102187922,102189594,102178163,102184982,102181755,102188324,102190639,102178640,102173685,102181384,102170846
GO:0070887	cellular response to chemical stimulus	biological_process	0.73445	1	287	87	20542	102185438
GO:0006915	apoptotic process	biological_process	0.73553	2	287	178	20542	102171047,102173992
GO:0012501	programmed cell death	biological_process	0.73553	2	287	178	20542	102173992,102171047
GO:0006650	glycerophospholipid metabolic process	biological_process	0.73679	1	287	88	20542	108634151
GO:0003724	RNA helicase activity	molecular_function	0.73741	1	287	90	20542	102187396
GO:0005789	endoplasmic reticulum membrane	cellular_component	0.73772	2	287	179	20542	102169825,102179863
GO:0080090	regulation of primary metabolic process	biological_process	0.73814	30	287	2261	20542	102170196,102173343,102169933,102171985,102185438,102190936,102174369,102179804,102172910,102188823,102191831,102172653,102169746,102176620,102170213,102173992,102191313,106502661,100861358,102179779,102187922,102189594,102181755,102184982,102178640,102190639,102188324,102173685,102170846,102181384
GO:0009142	nucleoside triphosphate biosynthetic process	biological_process	0.73832	1	287	96	20542	102191313
GO:0009145	purine nucleoside triphosphate biosynthetic process	biological_process	0.73832	1	287	96	20542	102191313
GO:0009201	ribonucleoside triphosphate biosynthetic process	biological_process	0.73832	1	287	96	20542	102191313
GO:0009206	purine ribonucleoside triphosphate biosynthetic process	biological_process	0.73832	1	287	96	20542	102191313
GO:0005524	ATP binding	molecular_function	0.73919	23	287	1719	20542	102178200,102172470,102188484,102191317,102180081,102180282,102178168,102188823,102187396,102178331,102171047,102189849,102171405,102172287,102184414,102185895,102187922,100861158,102174367,102177453,102184810,102191313,102179779
GO:0033365	protein localization to organelle	biological_process	0.73933	3	287	258	20542	102189849,102187638,102187396
GO:0016668	oxidoreductase activity, acting on a sulfur group of donors, NAD(P) as acceptor	molecular_function	0.73964	1	287	92	20542	102171485
GO:0047134	protein-disulfide reductase activity	molecular_function	0.73964	1	287	92	20542	102171485
GO:0033176	proton-transporting V-type ATPase complex	cellular_component	0.73974	1	287	92	20542	102171391
GO:0009127	purine nucleoside monophosphate biosynthetic process	biological_process	0.74003	1	287	96	20542	102191313
GO:0009168	purine ribonucleoside monophosphate biosynthetic process	biological_process	0.74003	1	287	96	20542	102191313
GO:0044424	intracellular part	cellular_component	0.74044	65	287	4973	20542	102185309,108633345,102180885,102181384,102177425,102184982,102178163,102169433,102173754,102188426,102185100,102171867,102172616,102179783,102173394,102176620,102172653,102185858,102191313,102190985,102187922,102188324,102176043,102179863,102172912,102184374,102185438,102169933,102175861,102189598,102191831,102188823,102172855,102188188,102183123,106502661,102171485,102173992,106504013,102173281…
GO:0098796	membrane protein complex	cellular_component	0.74045	9	287	741	20542	102173992,108636774,102180611,102191313,102173962,102189356,102171391,102169858,102168606
GO:0034062	RNA polymerase activity	molecular_function	0.74046	3	287	263	20542	102168282,102181452,102179804
GO:0006790	sulfur compound metabolic process	biological_process	0.7415	1	287	90	20542	102185895
GO:0043168	anion binding	molecular_function	0.7415	32	287	2372	20542	100860957,102181071,102171485,102177453,102180081,102178168,102178200,102172470,102171047,102178331,102174367,102187922,102185895,102189681,100861158,102191313,102184810,102181151,102180522,102179779,102176556,102187814,102191317,102180282,102188823,102188484,102189849,102171405,102172287,102171985,102184414,102187396
GO:0030030	cell projection organization	biological_process	0.74168	1	287	92	20542	102172234
GO:0044421	extracellular region part	cellular_component	0.74168	4	287	340	20542	102190639,102178363,102189774,102191474
GO:0044423	virion part	cellular_component	0.74169	7	287	579	20542	102174369,102181634,102188410,102171391,102176043,102170793,102173630
GO:0004527	exonuclease activity	molecular_function	0.74175	2	287	177	20542	102184374,102189229
GO:0032559	adenyl ribonucleotide binding	molecular_function	0.74233	23	287	1722	20542	100861158,102187922,102185895,102174367,102177453,102179779,102184810,102191313,102188484,102172470,102178200,102188823,102178168,102180282,102180081,102191317,102178331,102187396,102184414,102172287,102171405,102189849,102171047
GO:0050660	flavin adenine dinucleotide binding	molecular_function	0.74304	1	287	88	20542	102189681
GO:0046486	glycerolipid metabolic process	biological_process	0.74346	1	287	90	20542	108634151
GO:0009058	biosynthetic process	biological_process	0.74415	60	287	4595	20542	102190936,102179804,102174369,102172910,102176501,102175861,102168282,102191831,102172855,102188823,102173343,102187701,102174549,102172879,106502612,102185438,102181246,102171985,102169933,102187922,102189681,106503606,102190639,108634456,102178640,102188324,102174367,102181755,102170574,102170846,106503454,100861310,102169746,102176620,100861358,102191313,102185858,102179779,102178200,102188426…
GO:0005886	plasma membrane	cellular_component	0.7455	5	287	439	20542	102175861,102173343,102189356,102185858,108636774
GO:0006605	protein targeting	biological_process	0.74573	3	287	261	20542	102187396,102186276,102189849
GO:0016773	phosphotransferase activity, alcohol group as acceptor	molecular_function	0.74689	12	287	941	20542	102184414,102183790,102180522,102184810,102171047,102171485,102177453,102180282,102191317,102188484,100861158,102185895
GO:0044260	cellular macromolecule metabolic process	biological_process	0.74814	81	287	6068	20542	102173343,102187396,106502612,108637376,102184414,102171985,102181246,102187701,102189849,102172879,102174549,100861116,102176501,102174369,102190936,102191317,102179779,106503606,102170846,106503454,100861310,102178640,108634456,102170574,102174367,102170196,102189894,102181452,102183790,102171047,102180081,102177453,102183123,106502661,102170213,102173992,102189594,102173685,102173281,102185438…
GO:0060255	regulation of macromolecule metabolic process	biological_process	0.74885	30	287	2274	20542	102169933,102171985,102185438,102173343,102170196,102188823,102191831,102172910,102179804,102190936,102174369,102179779,102173992,102170213,106502661,102191313,100861358,102176620,102172653,102169746,102173685,102170846,102181384,102181755,102184982,102178640,102190639,102188324,102189594,102187922
GO:0016301	kinase activity	molecular_function	0.74962	15	287	1162	20542	102169746,102178331,102177453,102184810,102171047,102171485,102183790,102184414,102185895,102179804,102187196,102188484,100861158,102191317,102180282
GO:0042025	host cell nucleus	cellular_component	0.75075	1	287	95	20542	102179779
GO:0019752	carboxylic acid metabolic process	biological_process	0.75174	5	287	425	20542	102174367,102179779,102178168,102178200,102189681
GO:0009156	ribonucleoside monophosphate biosynthetic process	biological_process	0.75218	1	287	99	20542	102191313
GO:0044248	cellular catabolic process	biological_process	0.75268	7	287	585	20542	102170846,102171645,102183790,102189849,102178163,102171391,102172616
GO:0071840	cellular component organization or biogenesis	biological_process	0.75374	25	287	1935	20542	102191317,100860761,102174369,102169433,102189849,102169933,102187396,102177456,102184374,102186482,102178163,108637113,108634456,102184459,102170846,102179716,102180907,102187922,108636774,106502661,102184810,102186276,102182015,102172234,102173394
GO:0042175	nuclear outer membrane-endoplasmic reticulum membrane network	cellular_component	0.75537	2	287	185	20542	102179863,102169825
GO:0008219	cell death	biological_process	0.75564	2	287	185	20542	102171047,102173992
GO:0016265	death	biological_process	0.75564	2	287	185	20542	102173992,102171047
GO:0006914	autophagy	biological_process	0.75597	3	287	263	20542	102171645,102178163,102171391
GO:0009124	nucleoside monophosphate biosynthetic process	biological_process	0.75611	1	287	100	20542	102191313
GO:0033647	host intracellular organelle	cellular_component	0.75696	1	287	97	20542	102179779
GO:0033648	host intracellular membrane-bounded organelle	cellular_component	0.75696	1	287	97	20542	102179779
GO:0030695	GTPase regulator activity	molecular_function	0.75893	1	287	95	20542	108634545
GO:0006468	protein phosphorylation	biological_process	0.75978	8	287	647	20542	102177453,102184810,102171047,102184414,102188484,100861158,102191317,102180282
GO:0044432	endoplasmic reticulum part	cellular_component	0.76002	2	287	187	20542	102179863,102169825
GO:0007265	Ras protein signal transduction	biological_process	0.76005	1	287	91	20542	102184845
GO:0046578	regulation of Ras protein signal transduction	biological_process	0.76005	1	287	91	20542	102184845
GO:0016757	transferase activity, transferring glycosyl groups	molecular_function	0.76014	4	287	354	20542	102181899,102180619,102189772,100861310
GO:0007005	mitochondrion organization	biological_process	0.76021	1	287	96	20542	102186482
GO:0030554	adenyl nucleotide binding	molecular_function	0.76214	23	287	1743	20542	102177453,102191313,102184810,102179779,102185895,102187922,100861158,102174367,102187396,102178331,102189849,102171047,102171405,102172287,102184414,102178200,102188484,102172470,102191317,102180081,102178168,102180282,102188823
GO:0016567	protein ubiquitination	biological_process	0.76219	1	287	96	20542	102170846
GO:0051287	NAD binding	molecular_function	0.76364	1	287	96	20542	102181151
GO:0015093	ferrous iron transmembrane transporter activity	molecular_function	0.76483	1	287	97	20542	102187396
GO:0015684	ferrous iron transport	biological_process	0.76483	1	287	97	20542	102187396
GO:0009719	response to endogenous stimulus	biological_process	0.7653	1	287	95	20542	102185438
GO:0006260	DNA replication	biological_process	0.76691	5	287	433	20542	102172879,102180081,102172855,102174369,102175861
GO:0016627	oxidoreductase activity, acting on the CH-CH group of donors	molecular_function	0.76732	1	287	96	20542	102189681
GO:0098813	nuclear chromosome segregation	biological_process	0.76757	1	287	98	20542	102170846
GO:0042221	response to chemical	biological_process	0.76923	3	287	273	20542	102172234,102171645,102185438
GO:0006520	cellular amino acid metabolic process	biological_process	0.76925	3	287	274	20542	102178168,102179779,102174367
GO:2000112	regulation of cellular macromolecule biosynthetic process	biological_process	0.76935	28	287	2153	20542	102188324,102190639,102178640,102184982,102181755,102170846,102181384,102173685,102187922,102189594,106502661,100861358,102191313,102170213,102179779,102169746,102176620,102191831,102188823,102179804,102190936,102174369,102172910,102185438,102171985,102169933,102170196,102173343
GO:0016023	cytoplasmic membrane-bounded vesicle	cellular_component	0.77021	1	287	98	20542	102173394
GO:0051128	regulation of cellular component organization	biological_process	0.77043	2	287	196	20542	102169433,102170846
GO:0010556	regulation of macromolecule biosynthetic process	biological_process	0.77257	28	287	2157	20542	102188823,102191831,102190936,102174369,102179804,102172910,102171985,102169933,102185438,102170196,102173343,102181755,102184982,102188324,102190639,102178640,102173685,102181384,102170846,102187922,102189594,102170213,100861358,106502661,102191313,102179779,102169746,102176620
GO:0031326	regulation of cellular biosynthetic process	biological_process	0.77257	28	287	2157	20542	102170213,102191313,106502661,100861358,102179779,102169746,102176620,102184982,102181755,102190639,102178640,102188324,102173685,102170846,102181384,102187922,102189594,102171985,102169933,102185438,102170196,102173343,102188823,102191831,102174369,102190936,102179804,102172910
GO:0051239	regulation of multicellular organismal process	biological_process	0.77292	1	287	98	20542	102172287
GO:0031988	membrane-bounded vesicle	cellular_component	0.77356	1	287	99	20542	102173394
GO:0009405	pathogenesis	biological_process	0.77376	4	287	357	20542	102182979,102178936,102170735,102187396
GO:0006869	lipid transport	biological_process	0.77414	1	287	101	20542	102188823
GO:0009889	regulation of biosynthetic process	biological_process	0.77473	28	287	2160	20542	102169746,102176620,102170213,106502661,100861358,102191313,102179779,102187922,102189594,102181755,102184982,102190639,102178640,102188324,102173685,102181384,102170846,102173343,102170196,102171985,102169933,102185438,102190936,102174369,102179804,102172910,102188823,102191831
GO:0033013	tetrapyrrole metabolic process	biological_process	0.77507	1	287	100	20542	102189681
GO:1902600	hydrogen ion transmembrane transport	biological_process	0.7757	2	287	201	20542	102171391,102168606
GO:0051171	regulation of nitrogen compound metabolic process	biological_process	0.77579	28	287	2161	20542	102172910,102174369,102190936,102179804,102191831,102188823,102173343,102170196,102185438,102169933,102171985,102189594,102187922,102170846,102181384,102173685,102190639,102188324,102178640,102181755,102184982,102176620,102169746,102179779,100861358,106502661,102191313,102170213
GO:0033646	host intracellular part	cellular_component	0.77596	1	287	103	20542	102179779
GO:0043656	intracellular region of host	cellular_component	0.77596	1	287	103	20542	102179779
GO:0032446	protein modification by small protein conjugation	biological_process	0.77691	1	287	100	20542	102170846
GO:0002376	immune system process	biological_process	0.77723	4	287	380	20542	108635007,108636774,102173394,102189356
GO:0009607	response to biotic stimulus	biological_process	0.77768	2	287	197	20542	102191098,102172616
GO:0016591	DNA-directed RNA polymerase II, holoenzyme	cellular_component	0.77786	1	287	109	20542	102170574
GO:0006486	protein glycosylation	biological_process	0.77813	1	287	101	20542	100861310
GO:0043413	macromolecule glycosylation	biological_process	0.77813	1	287	101	20542	100861310
GO:0043436	oxoacid metabolic process	biological_process	0.77892	5	287	440	20542	102178200,102189681,102174367,102179779,102178168
GO:0005381	iron ion transmembrane transporter activity	molecular_function	0.77929	1	287	101	20542	102187396
GO:0042623	ATPase activity, coupled	molecular_function	0.78064	2	287	194	20542	106502661,102185895
GO:0022402	cell cycle process	biological_process	0.78066	4	287	361	20542	102187922,102174369,108634456,102170846
GO:0005887	integral component of plasma membrane	cellular_component	0.78099	1	287	102	20542	102175861
GO:0010468	regulation of gene expression	biological_process	0.78192	28	287	2169	20542	102184982,102181755,102190639,102178640,102188324,102173685,102181384,102170846,102187922,102189594,102170213,100861358,106502661,102191313,102179779,102169746,102176620,102188823,102191831,102179804,102190936,102174369,102172910,102171985,102169933,102185438,102173343,102170196
GO:0004672	protein kinase activity	molecular_function	0.78277	9	287	745	20542	102188484,100861158,102191317,102180282,102177453,102171047,102184810,102183790,102184414
GO:0015629	actin cytoskeleton	cellular_component	0.78347	1	287	103	20542	102169433
GO:0070085	glycosylation	biological_process	0.78428	1	287	103	20542	100861310
GO:0045502	dynein binding	molecular_function	0.78433	1	287	102	20542	102171391
GO:0015077	monovalent inorganic cation transmembrane transporter activity	molecular_function	0.78444	6	287	534	20542	102179783,102186276,100861026,102186504,102171391,102168606
GO:0031226	intrinsic component of plasma membrane	cellular_component	0.78446	1	287	103	20542	102175861
GO:0006082	organic acid metabolic process	biological_process	0.78598	5	287	444	20542	102179779,102178168,102174367,102189681,102178200
GO:0044283	small molecule biosynthetic process	biological_process	0.78702	2	287	197	20542	102178200,102172052
GO:0006814	sodium ion transport	biological_process	0.78805	1	287	105	20542	100861026
GO:0044763	single-organism cellular process	biological_process	0.79447	95	287	7359	20542	102169746,102186367,102177558,102172653,102183492,102173394,102172235,102184810,102191313,102180661,102182991,102185858,102185895,102187922,102190639,102180391,102184374,102191474,102185438,102169933,108637147,102187638,108637121,102188484,102175908,102191831,102188823,102189774,106502552,108635388,108633345,102173224,102183648,102177456,102169433,102178200,102174835,102172616,108633376,108634151…
GO:0051726	regulation of cell cycle	biological_process	0.79521	1	287	113	20542	102170846
GO:0007166	cell surface receptor signaling pathway	biological_process	0.79545	2	287	197	20542	102185756,102183492
GO:1901575	organic substance catabolic process	biological_process	0.79729	5	287	462	20542	102172616,102172653,102170846,102183790,102189849
GO:0006355	regulation of transcription, DNA-templated	biological_process	0.79734	27	287	2114	20542	102176620,102169746,102179779,102170213,106502661,100861358,102189594,102187922,102173685,102170846,102181384,102181755,102184982,102190639,102178640,102188324,102170196,102173343,102171985,102169933,102185438,102172910,102190936,102179804,102174369,102188823,102191831
GO:1903506	regulation of nucleic acid-templated transcription	biological_process	0.79734	27	287	2114	20542	102169933,102171985,102185438,102170196,102173343,102188823,102191831,102190936,102179804,102174369,102172910,102170213,106502661,100861358,102179779,102169746,102176620,102181755,102184982,102188324,102190639,102178640,102173685,102181384,102170846,102187922,102189594
GO:0046483	heterocycle metabolic process	biological_process	0.79868	57	287	4309	20542	102170213,106502661,102169786,106504013,102189594,102184982,102173685,102181384,102189894,102181452,102189372,102170196,102178331,102183790,102180081,102174830,102180994,108637349,102178168,102172052,102169746,102176620,102184810,102191313,100861358,102185858,102179779,102187922,102190985,102189681,102181755,102170574,102174367,108634456,102190639,102178640,102188324,102170846,102187396,102173343…
GO:0051056	regulation of small GTPase mediated signal transduction	biological_process	0.7987	1	287	102	20542	102184845
GO:0006139	nucleobase-containing compound metabolic process	biological_process	0.79911	55	287	4169	20542	102178168,108637349,102180081,102174830,102180994,102183790,102178331,102189894,102181452,102189372,102170196,102173685,102181384,102184982,102189594,106504013,102169786,102170213,106502661,102188823,102172855,102191831,102175908,102168282,102172910,102175861,102190936,102174369,102179804,102171985,102169933,102186164,108637376,102185438,102172879,102189849,102187396,102173343,102170846,102174367…
GO:0000428	DNA-directed RNA polymerase complex	cellular_component	0.80028	1	287	116	20542	102170574
GO:0030880	RNA polymerase complex	cellular_component	0.80028	1	287	116	20542	102170574
GO:0055029	nuclear DNA-directed RNA polymerase complex	cellular_component	0.80028	1	287	116	20542	102170574
GO:2001141	regulation of RNA biosynthetic process	biological_process	0.80034	27	287	2118	20542	102179779,102170213,106502661,100861358,102176620,102169746,102173685,102181384,102170846,102181755,102184982,102188324,102190639,102178640,102189594,102187922,102169933,102171985,102185438,102170196,102173343,102188823,102191831,102172910,102190936,102179804,102174369
GO:0009101	glycoprotein biosynthetic process	biological_process	0.8009	1	287	108	20542	100861310
GO:0006826	iron ion transport	biological_process	0.8019	1	287	108	20542	102187396
GO:0009605	response to external stimulus	biological_process	0.80199	3	287	295	20542	102172616,102172234,102171645
GO:0051252	regulation of RNA metabolic process	biological_process	0.80251	27	287	2121	20542	102185438,102171985,102169933,102170196,102173343,102191831,102188823,102172910,102190936,102174369,102179804,102179779,100861358,106502661,102170213,102176620,102169746,102181384,102170846,102173685,102190639,102178640,102188324,102181755,102184982,102189594,102187922
GO:0051536	iron-sulfur cluster binding	molecular_function	0.80261	1	287	109	20542	102187982
GO:0051540	metal cluster binding	molecular_function	0.80261	1	287	109	20542	102187982
GO:0018130	heterocycle biosynthetic process	biological_process	0.80296	37	287	2879	20542	102191831,102188823,102172910,102168282,102190936,102179804,102174369,102185438,102171985,102169933,102173343,102170846,102190639,108634456,102188324,102178640,102170574,102181755,102189681,102187922,102179779,102185858,100861358,102191313,102176620,102169746,108637349,102172052,102180994,102170196,102181452,102181384,102173685,102184982,102189594,106502661,102170213
GO:0044454	nuclear chromosome part	cellular_component	0.80464	1	287	111	20542	102175861
GO:0034654	nucleobase-containing compound biosynthetic process	biological_process	0.80476	35	287	2740	20542	106502661,102170213,102189594,102184982,102181384,102173685,102170196,102181452,102180994,108637349,102169746,102176620,100861358,102191313,102179779,102185858,102187922,108634456,102188324,102178640,102190639,102181755,102170574,102170846,102173343,102185438,102171985,102169933,102179804,102190936,102174369,102172910,102168282,102191831,102188823
GO:0032501	multicellular organismal process	biological_process	0.8063	9	287	801	20542	102172052,102179783,102171106,102174835,102172287,106502552,102181244,102172234,102183492
GO:0010033	response to organic substance	biological_process	0.8064	1	287	108	20542	102185438
GO:0019899	enzyme binding	molecular_function	0.80868	1	287	109	20542	102170196
GO:0009100	glycoprotein metabolic process	biological_process	0.80952	1	287	111	20542	100861310
GO:0005623	cell	cellular_component	0.80963	76	287	5860	20542	106503606,102177296,106503454,108634456,102178640,102170574,102171391,102169825,102174608,102173962,108636774,102176501,102174369,102173343,102187396,108637376,106502612,102181246,102172879,102189849,102174549,102187701,102169637,106504013,102173281,102189356,102183123,106502661,102173992,102171485,102181244,102183601,102181899,102186482,102181452,102171645,102180611,102190985,102187922,102188324…
GO:0044464	cell part	cellular_component	0.80963	76	287	5860	20542	108636774,102173962,102174608,102169825,102171391,102170574,108634456,102178640,106503454,102177296,106503606,102174549,102172879,102187701,102189849,102181246,106502612,108637376,102187396,102173343,102174369,102176501,102171485,102181244,102173992,106502661,102183123,102189356,102173281,106504013,102169637,102180611,102171645,102181452,102186482,102181899,102183601,102191313,102185858,102174296…
GO:0006818	hydrogen transport	biological_process	0.81036	2	287	216	20542	102168606,102171391
GO:0015992	proton transport	biological_process	0.81036	2	287	216	20542	102168606,102171391
GO:0008134	transcription factor binding	molecular_function	0.81107	2	287	204	20542	102180907,102171391
GO:0019219	regulation of nucleobase-containing compound metabolic process	biological_process	0.81325	27	287	2136	20542	102188823,102191831,102172910,102179804,102190936,102174369,102171985,102169933,102185438,102170196,102173343,102173685,102181384,102170846,102184982,102181755,102190639,102178640,102188324,102189594,102187922,102179779,102170213,100861358,106502661,102176620,102169746
GO:0046906	tetrapyrrole binding	molecular_function	0.81391	2	287	213	20542	102174710,102174606
GO:0031683	G-protein beta/gamma-subunit complex binding	molecular_function	0.81419	1	287	123	20542	102187814
GO:0009987	cellular process	biological_process	0.81514	160	287	12095	20542	102169746,102177558,102172653,102183492,102173394,102172235,100861358,102185858,100861158,102176043,102188324,102191474,102186164,102179804,102188484,102175861,102168282,102191831,102188823,102172855,102189774,102185309,108635388,102169786,102180885,102184982,102178163,102179716,102177425,102173224,102170793,102169433,102172616,102174835,102188426,108633376,102185100,108634151,108635491,102182887…
GO:0051186	cofactor metabolic process	biological_process	0.81555	2	287	212	20542	102189681,102171985
GO:0016192	vesicle-mediated transport	biological_process	0.81785	4	287	380	20542	102169933,102173962,102172616,102188410
GO:1902582	single-organism intracellular transport	biological_process	0.82044	5	287	465	20542	102186276,102189849,102187396,102186482,102185309
GO:0003678	DNA helicase activity	molecular_function	0.82077	1	287	115	20542	102189849
GO:0004386	helicase activity	molecular_function	0.82133	2	287	212	20542	102189849,102187396
GO:0008757	S-adenosylmethionine-dependent methyltransferase activity	molecular_function	0.82191	1	287	116	20542	102187196
GO:0005622	intracellular	cellular_component	0.82247	69	287	5381	20542	102183123,106502661,102171485,102173992,102173281,102169637,106504013,102180611,102186482,102181452,102181899,102183601,102173962,102174608,102171391,102169825,106503454,108634456,102178640,102170574,106503606,102177296,106502612,108637376,102181246,102172879,102174549,102189849,102187701,102187396,102176501,102174369,108633345,102185309,102181384,102177425,102178163,102184982,102180885,102169433…
GO:0009056	catabolic process	biological_process	0.82316	8	287	716	20542	102172616,102178163,102170846,102172653,102171391,102189849,102171645,102183790
GO:0044237	cellular metabolic process	biological_process	0.82353	96	287	7267	20542	102172616,102178200,102188426,102185100,108634151,102174830,108637349,102182887,102178168,102168955,102178331,102180885,102178163,102184982,102181384,102177425,102185309,102175805,102169786,102179804,102175861,102188484,102172910,102175908,102168282,102180282,102191831,102172855,102188823,102186164,102185438,102169933,102187922,102190985,102185895,102183434,100861158,102190639,102188324,102176043…
GO:0097367	carbohydrate derivative binding	molecular_function	0.82407	27	287	2124	20542	102185895,102187922,100860957,100861158,102174367,102177453,102172105,102191313,102184810,102179779,102178200,102172470,102188484,102191317,102187814,102180081,102180282,102178168,102188823,102187396,102178331,102189849,102171047,102171405,102172287,102184414,102171985
GO:0044711	single-organism biosynthetic process	biological_process	0.82422	8	287	720	20542	102185858,102191313,102189681,102178200,108637349,102178496,102172052,102180994
GO:0010604	positive regulation of macromolecule metabolic process	biological_process	0.8247	1	287	120	20542	102170196
GO:0006399	tRNA metabolic process	biological_process	0.82494	3	287	301	20542	102174830,102174367,102178168
GO:0042451	purine nucleoside biosynthetic process	biological_process	0.82734	1	287	125	20542	102191313
GO:0046129	purine ribonucleoside biosynthetic process	biological_process	0.82734	1	287	125	20542	102191313
GO:0019438	aromatic compound biosynthetic process	biological_process	0.82737	36	287	2845	20542	102189594,102181384,102173685,102184982,106502661,102170213,108637349,102180994,102170196,102181452,102189681,102187922,102170846,102178640,108634456,102188324,102190639,102170574,102181755,102176620,102169746,102185858,102179779,100861358,102191313,102172910,102168282,102179804,102190936,102174369,102191831,102188823,102173343,102185438,102169933,102171985
GO:1901362	organic cyclic compound biosynthetic process	biological_process	0.82753	37	287	2918	20542	102170574,102181755,102178640,108634456,102188324,102190639,102170846,102187922,102189681,100861358,102191313,102185858,102179779,102169746,102176620,102188823,102191831,102179804,102174369,102190936,102168282,102172910,102169933,102171985,102185438,102173343,102184982,102173685,102181384,102189594,102170213,106502661,102180994,108637349,102172052,102181452,102170196
GO:0008234	cysteine-type peptidase activity	molecular_function	0.82829	2	287	227	20542	102168955,102181634
GO:1901360	organic cyclic compound metabolic process	biological_process	0.8283	57	287	4364	20542	102169746,102176620,102191313,102184810,100861358,102179779,102185858,102187922,102190985,102189681,102174367,102181755,102170574,108634456,102178640,102190639,102188324,102170846,102187396,102173343,102172879,102189849,102169933,102171985,108637376,102185438,102186164,102190936,102174369,102179804,102175908,102168282,102172910,102175861,102188823,102172855,102191831,102170213,106502661,102169786…
GO:0015081	sodium ion transmembrane transporter activity	molecular_function	0.82998	1	287	116	20542	100861026
GO:0008237	metallopeptidase activity	molecular_function	0.83041	2	287	210	20542	102171917,102180048
GO:0005794	Golgi apparatus	cellular_component	0.83117	1	287	117	20542	102178163
GO:0065004	protein-DNA complex assembly	biological_process	0.83254	1	287	135	20542	108634456
GO:0071824	protein-DNA complex subunit organization	biological_process	0.83254	1	287	135	20542	108634456
GO:0032940	secretion by cell	biological_process	0.83312	1	287	122	20542	102172616
GO:0046903	secretion	biological_process	0.83577	1	287	123	20542	102172616
GO:0051259	protein oligomerization	biological_process	0.83762	1	287	120	20542	102180907
GO:0006725	cellular aromatic compound metabolic process	biological_process	0.83839	56	287	4312	20542	102191313,100861358,102184810,102179779,102185858,102169746,102176620,102170574,102174367,102181755,108634456,102188324,102190639,102178640,102170846,102187922,102190985,102189681,102172879,102189849,102169933,102171985,102185438,108637376,102186164,102187396,102173343,102188823,102172855,102191831,102174369,102190936,102179804,102168282,102175908,102172910,102175861,102170213,106502661,102169786…
GO:0016482	cytoplasmic transport	biological_process	0.84105	3	287	311	20542	102189849,102186482,102187396
GO:0022607	cellular component assembly	biological_process	0.84268	9	287	830	20542	102180907,102187922,102174369,108634456,102178163,102186482,102184810,106502661,102169433
GO:0006351	transcription, DNA-templated	biological_process	0.8443	31	287	2502	20542	102189594,102187922,102173685,102170846,102181384,102184982,102181755,102170574,108634456,102190639,102188324,102178640,102176620,102169746,102179779,102170213,106502661,100861358,102168282,102172910,102190936,102179804,102174369,102188823,102191831,102181452,102173343,102170196,102171985,102169933,102185438
GO:0097659	nucleic acid-templated transcription	biological_process	0.8443	31	287	2502	20542	102189594,102187922,102181384,102170846,102173685,102188324,108634456,102190639,102178640,102184982,102170574,102181755,102176620,102169746,102179779,106502661,100861358,102170213,102172910,102168282,102190936,102179804,102174369,102191831,102188823,102170196,102173343,102181452,102185438,102171985,102169933
GO:0016070	RNA metabolic process	biological_process	0.84482	40	287	3159	20542	100861358,102179779,102169746,102176620,102174367,102170574,102181755,102178640,108634456,102190639,102188324,102170846,102187922,102190985,102189849,102169933,102171985,102185438,108637376,102186164,102187396,102173343,102188823,102191831,102190936,102179804,102174369,102168282,102172910,102170213,106502661,102169786,102184982,102173685,102181384,102189594,102181452,102170196,102174830,102178168
GO:0000228	nuclear chromosome	cellular_component	0.84627	1	287	127	20542	102175861
GO:0042803	protein homodimerization activity	molecular_function	0.8476	1	287	125	20542	102171391
GO:0032403	protein complex binding	molecular_function	0.8512	3	287	329	20542	102180081,102187814,102188823
GO:0006396	RNA processing	biological_process	0.85219	6	287	574	20542	102187396,102190985,108637376,102169786,102174830,102188324
GO:0009163	nucleoside biosynthetic process	biological_process	0.85276	1	287	135	20542	102191313
GO:0042455	ribonucleoside biosynthetic process	biological_process	0.85276	1	287	135	20542	102191313
GO:0035639	purine ribonucleoside triphosphate binding	molecular_function	0.85305	25	287	2020	20542	102174367,100861158,102187922,102185895,102179779,102184810,102191313,102177453,102178168,102180282,102188823,102187814,102191317,102180081,102172470,102188484,102178200,102172287,102184414,102171985,102171047,102189849,102171405,102178331,102187396
GO:0033643	host cell part	cellular_component	0.85308	1	287	131	20542	102179779
GO:0051276	chromosome organization	biological_process	0.85407	3	287	334	20542	108634456,102189849,102170846
GO:0006629	lipid metabolic process	biological_process	0.85424	5	287	494	20542	102190639,102178496,102178200,102189681,108634151
GO:0005634	nucleus	cellular_component	0.85462	25	287	2083	20542	102171485,102174608,102170574,102184982,102188324,108634456,102181384,102190985,102187922,102172879,102169933,102185438,108637376,102181452,102187396,102186482,102172912,102179783,102172855,102191831,102189598,102171867,102174369,102183601,102175861
GO:0000152	nuclear ubiquitin ligase complex	cellular_component	0.85477	1	287	130	20542	102171867
GO:0005680	anaphase-promoting complex	cellular_component	0.85477	1	287	130	20542	102171867
GO:0031461	cullin-RING ubiquitin ligase complex	cellular_component	0.85477	1	287	130	20542	102171867
GO:0001883	purine nucleoside binding	molecular_function	0.85511	25	287	2023	20542	102171985,102184414,102172287,102171405,102189849,102171047,102178331,102187396,102188823,102178168,102180282,102180081,102187814,102191317,102172470,102188484,102178200,102179779,102184810,102191313,102177453,102174367,100861158,102185895,102187922
GO:0032549	ribonucleoside binding	molecular_function	0.85511	25	287	2023	20542	102178200,102172470,102188484,102180081,102191317,102187814,102188823,102180282,102178168,102187396,102178331,102171405,102171047,102189849,102171985,102184414,102172287,102185895,102187922,100861158,102174367,102177453,102191313,102184810,102179779
GO:0032550	purine ribonucleoside binding	molecular_function	0.85511	25	287	2023	20542	102179779,102191313,102184810,102177453,102174367,100861158,102187922,102185895,102171985,102184414,102172287,102171405,102189849,102171047,102178331,102187396,102188823,102178168,102180282,102180081,102187814,102191317,102188484,102172470,102178200
GO:0072594	establishment of protein localization to organelle	biological_process	0.8555	2	287	229	20542	102187396,102189849
GO:0032555	purine ribonucleotide binding	molecular_function	0.8573	25	287	2027	20542	102171405,102171047,102189849,102184414,102171985,102172287,102187396,102178331,102180081,102191317,102187814,102188823,102178168,102180282,102178200,102188484,102172470,102191313,102184810,102179779,102177453,102174367,102185895,102187922,100861158
GO:1901659	glycosyl compound biosynthetic process	biological_process	0.8574	1	287	137	20542	102191313
GO:0032787	monocarboxylic acid metabolic process	biological_process	0.85792	1	287	130	20542	102178200
GO:0000151	ubiquitin ligase complex	cellular_component	0.85934	1	287	132	20542	102171867
GO:0070838	divalent metal ion transport	biological_process	0.85992	1	287	131	20542	102187396
GO:0001882	nucleoside binding	molecular_function	0.8602	25	287	2031	20542	102187396,102178331,102171405,102171047,102189849,102184414,102171985,102172287,102178200,102172470,102188484,102180081,102187814,102191317,102188823,102180282,102178168,102177453,102191313,102184810,102179779,102185895,102187922,100861158,102174367
GO:0032774	RNA biosynthetic process	biological_process	0.86067	31	287	2530	20542	102179779,100861358,106502661,102170213,102176620,102169746,102181384,102170846,102173685,108634456,102188324,102190639,102178640,102184982,102181755,102170574,102189594,102187922,102185438,102169933,102171985,102170196,102173343,102181452,102191831,102188823,102172910,102168282,102190936,102174369,102179804
GO:1990234	transferase complex	cellular_component	0.86282	3	287	336	20542	102171867,102169858,102170574
GO:0044699	single-organism process	biological_process	0.86421	119	287	9179	20542	102182653,102183601,102180081,102180994,102169617,102178496,102172052,102189894,102189372,102186504,102170196,102186482,102180611,102189751,102171047,102181032,102183790,102171645,102174989,106504013,102171106,102189594,102173685,102185756,102168759,108633422,102172234,102181244,102173992,102171485,102169875,102174369,102186987,102175750,102187814,102174606,102187396,106502639,102170261,102189849…
GO:0034061	DNA polymerase activity	molecular_function	0.86491	1	287	133	20542	102180081
GO:0030117	membrane coat	cellular_component	0.86532	1	287	131	20542	102173962
GO:0048475	coated membrane	cellular_component	0.86532	1	287	131	20542	102173962
GO:0006644	phospholipid metabolic process	biological_process	0.86586	1	287	134	20542	108634151
GO:0003993	acid phosphatase activity	molecular_function	0.86626	1	287	127	20542	102176431
GO:0007059	chromosome segregation	biological_process	0.86662	1	287	135	20542	102170846
GO:0043231	intracellular membrane-bounded organelle	cellular_component	0.86683	36	287	2931	20542	102170574,108634456,102178640,102188324,102187922,102190985,102191313,102174608,102169825,102173394,102172855,102189598,102191831,102174369,102175861,102172879,102169933,108637376,102185438,102187396,102172912,102179863,102178163,102184982,102181384,102173992,102171485,108633345,102185309,102179783,102181899,102171867,102183601,102180611,102181452,102186482
GO:0005085	guanyl-nucleotide exchange factor activity	molecular_function	0.86694	1	287	129	20542	102184845
GO:0043227	membrane-bounded organelle	cellular_component	0.86734	36	287	2932	20542	108633345,102173992,102171485,102185309,102184982,102178163,102181384,102180611,102181452,102186482,102181899,102179783,102171867,102183601,102191313,102174608,102169825,102173394,102188324,108634456,102178640,102170574,102187922,102190985,102172879,108637376,102185438,102169933,102187396,102179863,102172912,102189598,102191831,102172855,102174369,102175861
GO:0018995	host	cellular_component	0.86811	1	287	139	20542	102179779
GO:0043657	host cell	cellular_component	0.86811	1	287	139	20542	102179779
GO:0046915	transition metal ion transmembrane transporter activity	molecular_function	0.86924	1	287	138	20542	102187396
GO:0044215	other organism	cellular_component	0.86938	1	287	140	20542	102179779
GO:0044216	other organism cell	cellular_component	0.86938	1	287	140	20542	102179779
GO:0044217	other organism part	cellular_component	0.86938	1	287	140	20542	102179779
GO:0007017	microtubule-based process	biological_process	0.86944	2	287	237	20542	102188823,102180081
GO:0032553	ribonucleotide binding	molecular_function	0.86979	25	287	2049	20542	102177453,102191313,102184810,102179779,102185895,102187922,100861158,102174367,102187396,102178331,102171405,102189849,102171047,102171985,102184414,102172287,102178200,102172470,102188484,102180081,102191317,102187814,102188823,102178168,102180282
GO:0019031	viral envelope	cellular_component	0.87074	2	287	243	20542	102170793,102181634
GO:0036338	viral membrane	cellular_component	0.87074	2	287	243	20542	102170793,102181634
GO:0017076	purine nucleotide binding	molecular_function	0.87101	25	287	2050	20542	102188823,102180282,102178168,102180081,102191317,102187814,102188484,102172470,102178200,102184414,102171985,102172287,102171405,102189849,102171047,102178331,102187396,102174367,100861158,102185895,102187922,102179779,102184810,102191313,102177453
GO:0043170	macromolecule metabolic process	biological_process	0.87103	88	287	6806	20542	102171917,102180885,102181384,102177425,102184982,102185309,102175805,102178021,102169786,102188426,102185100,102172616,102182887,102178168,102174830,102168955,102183434,100861158,102187922,102190985,102188324,102190639,102176043,102181755,102190009,102176620,102169746,102172653,108634545,102191313,100861358,102184810,102175861,102188484,102172910,102168282,102175908,102179804,102191831,102180282…
GO:0098542	defense response to other organism	biological_process	0.87212	1	287	141	20542	102172616
GO:0022804	active transmembrane transporter activity	molecular_function	0.87213	2	287	235	20542	102185895,106502661
GO:0016616	oxidoreductase activity, acting on the CH-OH group of donors, NAD or NADP as acceptor	molecular_function	0.87513	1	287	140	20542	102189681
GO:0006732	coenzyme metabolic process	biological_process	0.87574	1	287	143	20542	102171985
GO:0032991	macromolecular complex	cellular_component	0.88098	35	287	3060	20542	102180611,102169433,102172616,102171867,102188426,102173754,102185100,102173992,102183123,102189356,102185309,102173281,102178163,102177425,102180885,102187701,102174549,106502612,102181246,102188188,102169858,102176501,102175861,102191313,108636774,102173962,102185858,102172653,102171391,102176620,102176043,102170574,106503454,102168606,106503606
GO:0036094	small molecule binding	molecular_function	0.88117	29	287	2361	20542	102172287,102171985,102184414,102171047,102189849,102171405,102178331,102169720,102187396,102178168,102174606,102180282,102188823,102187814,102191317,102180081,102188484,102172470,102178200,102181151,102179779,102191313,102184810,102177453,102174367,102189681,100861158,102187922,102185895
GO:0072511	divalent inorganic cation transport	biological_process	0.88194	1	287	143	20542	102187396
GO:0090304	nucleic acid metabolic process	biological_process	0.88313	48	287	3819	20542	102190936,102179804,102174369,102172910,102175861,102168282,102175908,102191831,102172855,102188823,102173343,102187396,102172879,102189849,102186164,108637376,102185438,102169933,102171985,102190985,102187922,102190639,108634456,102178640,102188324,102181755,102174367,102170574,102170846,102169746,102176620,100861358,102184810,102179779,102174830,102180081,102178168,102170196,102189894,102181452…
GO:1901605	alpha-amino acid metabolic process	biological_process	0.8855	1	287	147	20542	102179779
GO:0005576	extracellular region	cellular_component	0.88707	16	287	1454	20542	102183492,102172653,102189774,102178363,102181244,106502552,102171106,102170735,102190639,102179863,102191474,102182979,102181610,102174835,102172616,102178936
GO:0006464	cellular protein modification process	biological_process	0.89247	17	287	1490	20542	102184414,102171047,102168955,102187396,102180282,102182887,102191317,102168282,102188484,108634545,102184810,102177453,102190009,100861310,102170846,102183434,100861158
GO:0036211	protein modification process	biological_process	0.89247	17	287	1490	20542	100861310,102170846,100861158,102183434,108634545,102184810,102177453,102190009,102182887,102180282,102191317,102168282,102188484,102184414,102171047,102168955,102187396
GO:1901137	carbohydrate derivative biosynthetic process	biological_process	0.89279	3	287	355	20542	102191313,102185858,100861310
GO:0015979	photosynthesis	biological_process	0.89295	1	287	152	20542	102185858
GO:0000166	nucleotide binding	molecular_function	0.89349	28	287	2312	20542	102178200,102172470,102188484,102180081,102187814,102191317,102188823,102178168,102180282,102187396,102169720,102178331,102171405,102189849,102171047,102184414,102171985,102172287,102185895,102187922,100861158,102189681,102174367,102177453,102184810,102191313,102179779,102181151
GO:1901265	nucleoside phosphate binding	molecular_function	0.89349	28	287	2312	20542	102187922,102185895,102189681,100861158,102174367,102177453,102191313,102184810,102181151,102179779,102178200,102172470,102188484,102191317,102187814,102180081,102178168,102180282,102188823,102169720,102187396,102178331,102171047,102189849,102171405,102172287,102171985,102184414
GO:0006952	defense response	biological_process	0.89435	3	287	386	20542	102184810,102171106,102172616
GO:0046873	metal ion transmembrane transporter activity	molecular_function	0.89474	5	287	525	20542	100861026,102187396,102186504,102179783,102186276
GO:0016053	organic acid biosynthetic process	biological_process	0.89511	1	287	152	20542	102178200
GO:0046394	carboxylic acid biosynthetic process	biological_process	0.89511	1	287	152	20542	102178200
GO:0040011	locomotion	biological_process	0.89724	2	287	258	20542	102172234,102171645
GO:0016614	oxidoreductase activity, acting on CH-OH group of donors	molecular_function	0.89735	1	287	153	20542	102189681
GO:0009611	response to wounding	biological_process	0.89759	1	287	153	20542	102179783
GO:0042060	wound healing	biological_process	0.89759	1	287	153	20542	102179783
GO:0048870	cell motility	biological_process	0.89767	1	287	152	20542	102171645
GO:0051674	localization of cell	biological_process	0.89767	1	287	152	20542	102171645
GO:0051258	protein polymerization	biological_process	0.89847	1	287	157	20542	102169433
GO:0007049	cell cycle	biological_process	0.89873	5	287	552	20542	102187922,102174369,108634456,102180661,102170846
GO:0042995	cell projection	cellular_component	0.90235	1	287	157	20542	102171645
GO:0044707	single-multicellular organism process	biological_process	0.90461	6	287	651	20542	102179783,102172052,102172287,102183492,102172234,102171106
GO:0016887	ATPase activity	molecular_function	0.90467	4	287	451	20542	102185895,102187396,106502661,102191313
GO:1902580	single-organism cellular localization	biological_process	0.90779	2	287	267	20542	102187396,102189849
GO:0003676	nucleic acid binding	molecular_function	0.90794	46	287	3811	20542	102189849,102185438,108637376,102172287,102173343,102187396,102191831,102189598,102175270,102178870,102190936,102174369,102179804,102169858,102172910,102175861,102175908,102168282,102184810,102174608,102169746,102185641,108634456,102188324,102178640,102180738,102170574,102187922,102190985,102187196,108635093,102183790,102168637,102170196,102186482,102172470,102183601,106502661,102171485,102170213…
GO:0098662	inorganic cation transmembrane transport	biological_process	0.90807	2	287	277	20542	102168606,102171391
GO:0048037	cofactor binding	molecular_function	0.90833	3	287	363	20542	102189681,102181151,102182991
GO:0044710	single-organism metabolic process	biological_process	0.90838	37	287	3047	20542	102171485,102174989,106504013,102189594,102179682,102189894,102189372,102189751,102181032,102183790,102178200,102182653,108634151,102180994,108637349,102169617,102172052,102178168,102178496,106503257,102185641,102182991,102191313,102185858,102179779,102189681,102174367,102190639,102174710,100861310,102170846,102189849,102184272,102186987,102175908,102191831,102174606
GO:0098660	inorganic ion transmembrane transport	biological_process	0.91024	2	287	279	20542	102171391,102168606
GO:0006366	transcription from RNA polymerase II promoter	biological_process	0.91458	2	287	279	20542	102170574,100861358
GO:0043207	response to external biotic stimulus	biological_process	0.91642	1	287	169	20542	102172616
GO:0051707	response to other organism	biological_process	0.91642	1	287	169	20542	102172616
GO:0098655	cation transmembrane transport	biological_process	0.91645	2	287	285	20542	102168606,102171391
GO:0015078	hydrogen ion transmembrane transporter activity	molecular_function	0.91702	2	287	295	20542	102168606,102171391
GO:0004222	metalloendopeptidase activity	molecular_function	0.91906	1	287	165	20542	102180048
GO:0006913	nucleocytoplasmic transport	biological_process	0.91918	1	287	166	20542	102186482
GO:0044877	macromolecular complex binding	molecular_function	0.92068	3	287	389	20542	102188823,102187814,102180081
GO:0034660	ncRNA metabolic process	biological_process	0.92207	3	287	380	20542	102174367,102174830,102178168
GO:0008152	metabolic process	biological_process	0.92242	122	287	9353	20542	102179779,102171391,102180048,106503257,100861310,102170846,106503454,102170574,102174367,108634456,102178640,102174710,106503606,102189681,102184414,102181246,102171985,106502612,108637376,100861116,102187701,102189849,102172879,102174549,102187396,102173343,102188128,102174606,102191317,102186987,102176501,102190936,102174369,102183123,102170213,102171485,102173992,106502661,102177453,102176878…
GO:0051169	nuclear transport	biological_process	0.92535	1	287	171	20542	102186482
GO:0070011	peptidase activity, acting on L-amino acid peptides	molecular_function	0.92591	10	287	1007	20542	102181634,102173343,102176878,102183492,102168955,102180048,102171391,102172616,102171917,108633175
GO:0019867	outer membrane	cellular_component	0.92775	1	287	177	20542	102173630
GO:0006508	proteolysis	biological_process	0.92921	10	287	1019	20542	102172616,108633175,102171917,102170846,102187396,102176878,102180048,102168955,102173992,102183790
GO:1902494	catalytic complex	cellular_component	0.93012	4	287	504	20542	102169858,102171867,102180611,102170574
GO:0098588	bounding membrane of organelle	cellular_component	0.93106	3	287	394	20542	102173992,102169825,102179863
GO:0072509	divalent inorganic cation transmembrane transporter activity	molecular_function	0.93132	1	287	179	20542	102187396
GO:0044085	cellular component biogenesis	biological_process	0.93196	9	287	954	20542	102178163,108634456,102174369,102180907,102187922,102169433,106502661,102184810,102186482
GO:0016818	hydrolase activity, acting on acid anhydrides, in phosphorus-containing anhydrides	molecular_function	0.93208	10	287	1015	20542	102187396,102171645,102189849,106502661,102191313,102187922,102185895,102188823,102180081,102187814
GO:0050662	coenzyme binding	molecular_function	0.93544	2	287	296	20542	102181151,102189681
GO:0016741	transferase activity, transferring one-carbon groups	molecular_function	0.93708	2	287	304	20542	102179779,102187196
GO:0017111	nucleoside-triphosphatase activity	molecular_function	0.93749	9	287	944	20542	102188823,102187814,102180081,102185895,102171645,102189849,106502661,102191313,102187396
GO:0098805	whole membrane	cellular_component	0.94003	1	287	188	20542	102173992
GO:0065007	biological regulation	biological_process	0.94015	74	287	6303	20542	102184845,102172287,102171985,102189849,106502639,102173343,102187396,102187814,102175750,102174369,102190936,102178363,102187357,102179779,102172514,102186276,108636774,102171391,102168474,102170846,102178640,106502258,102171008,102182917,102171047,102181032,102180611,102170196,102183601,102169875,106502661,102170213,102171485,102173992,102172234,108633422,102185756,102173685,102189594,102185438…
GO:0006310	DNA recombination	biological_process	0.94264	1	287	193	20542	102189894
GO:0016462	pyrophosphatase activity	molecular_function	0.94265	9	287	955	20542	102171645,102191313,106502661,102189849,102187396,102188823,102187814,102180081,102185895
GO:0020037	heme binding	molecular_function	0.94492	1	287	200	20542	102174710
GO:0016817	hydrolase activity, acting on acid anhydrides	molecular_function	0.94607	11	287	1128	20542	102185895,102190985,102187922,102188823,102187814,102180081,102187396,102171645,106502661,102189849,102191313
GO:0006281	DNA repair	biological_process	0.94809	4	287	513	20542	102183790,102189849,102175908,102189894
GO:0022890	inorganic cation transmembrane transporter activity	molecular_function	0.95089	7	287	807	20542	102179783,102186276,102168606,102171391,100861026,102187396,102186504
GO:0044712	single-organism catabolic process	biological_process	0.95142	1	287	206	20542	102170846
GO:0007264	small GTPase mediated signal transduction	biological_process	0.95199	3	287	426	20542	102187396,102187814,102184845
GO:0007165	signal transduction	biological_process	0.95363	37	287	3633	20542	102171485,108635388,102169875,102185756,102189774,102172234,102172616,102183601,102180611,102181032,102170196,102183648,102171008,106502258,102190639,102182917,102186276,102184810,102172514,102185858,102178363,102187357,102183492,102169746,102186367,102168474,102172235,102175750,102187814,108637121,102188484,102169933,102184845,102185438,102187396,106502639,102191474
GO:0004674	protein serine/threonine kinase activity	molecular_function	0.95517	1	287	209	20542	102183790
GO:0071704	organic substance metabolic process	biological_process	0.95545	101	287	8052	20542	102184414,102181246,102171985,106502612,108637376,100861116,102189849,102172879,102187701,102174549,102187396,102173343,102188128,102191317,102176501,102190936,102174369,102179779,102180048,100861310,102170846,106503454,102170574,102174367,102178640,108634456,106503606,102189681,102183790,102171047,102186482,102189372,102189894,102181452,102170196,102178496,102172052,102180081,102180994,102183123…
GO:0042578	phosphoric ester hydrolase activity	molecular_function	0.95546	3	287	427	20542	102190639,102180885,102176431
GO:0044238	primary metabolic process	biological_process	0.95563	97	287	7775	20542	102183790,102171047,102189372,102189894,102181452,102170196,102178496,102180081,102180994,102183123,102170213,102173992,106502661,102177453,102176878,102173685,102173281,108633175,102189594,106504013,102181246,102171985,102184414,108637376,106502612,100861116,102189849,102172879,102187701,102174549,102187396,102173343,102188128,102191317,102176501,102174369,102190936,102179779,102180048,100861310…
GO:0008233	peptidase activity	molecular_function	0.95608	10	287	1080	20542	102172616,102171917,108633175,102176878,102181634,102173343,102183492,102168955,102171391,102180048
GO:0003723	RNA binding	molecular_function	0.95748	6	287	749	20542	102169858,102187396,102190985,102186482,102188324,108637376
GO:0044700	single organism signaling	biological_process	0.95765	37	287	3652	20542	102181032,102180611,102183648,102170196,102172616,102183601,108635388,102171485,102169875,102189774,102185756,102172234,102184845,102185438,102169933,102187396,102191474,106502639,102187814,102175750,108637121,102188484,102186276,102172514,102184810,102187357,102178363,102185858,102186367,102169746,102183492,102168474,102172235,106502258,102190639,102171008,102182917
GO:0004553	hydrolase activity, hydrolyzing O-glycosyl compounds	molecular_function	0.95899	1	287	216	20542	102188128
GO:0023052	signaling	biological_process	0.95908	37	287	3659	20542	102169875,102171485,108635388,102172234,102185756,102189774,102183601,102172616,102180611,102181032,102170196,102183648,106502258,102190639,102171008,102182917,102185858,102178363,102187357,102184810,102172514,102186276,102172235,102168474,102183492,102186367,102169746,102175750,102187814,108637121,102188484,102169933,102184845,102185438,106502639,102191474,102187396
GO:0016788	hydrolase activity, acting on ester bonds	molecular_function	0.9591	9	287	988	20542	102184810,102169786,102184374,102187147,102190639,102174830,102189229,102176431,102180885
GO:0005179	hormone activity	molecular_function	0.95996	1	287	225	20542	102181610
GO:0016758	transferase activity, transferring hexosyl groups	molecular_function	0.96047	1	287	222	20542	102181899
GO:0046983	protein dimerization activity	molecular_function	0.96119	2	287	350	20542	102180738,102171391
GO:0009055	electron carrier activity	molecular_function	0.96199	1	287	234	20542	102185858
GO:0046914	transition metal ion binding	molecular_function	0.96204	22	287	2072	20542	102179682,102174710,102183434,102189594,102187922,102174296,102182991,108634545,108633422,102180048,102182887,108633376,102171989,102171867,102179804,102168637,102183554,102185438,102189849,102168955,102170196,102183648
GO:0043412	macromolecule modification	biological_process	0.96309	17	287	1672	20542	102177453,102190009,102184810,108634545,102183434,100861158,100861310,102170846,102168955,102187396,102184414,102171047,102168282,102188484,102182887,102180282,102191317
GO:0097159	organic cyclic compound binding	molecular_function	0.96337	70	287	5765	20542	102169746,102185641,102191313,102184810,102181151,102185895,102190985,102187922,102187196,100861158,102188324,102180738,102185438,102178870,102169858,102179804,102188484,102175861,102172910,102175908,102168282,102191831,102189598,102180282,102188823,102176670,102172049,102178331,108635093,102168637,102178200,102172470,102178168,102179779,102174608,102189681,108634456,102178640,102174710,102174367…
GO:1901363	heterocyclic compound binding	molecular_function	0.96337	70	287	5765	20542	102169746,102185641,102184810,102191313,102181151,102185895,102190985,102187922,102187196,100861158,102188324,102180738,102185438,102178870,102179804,102169858,102188484,102172910,102175861,102168282,102175908,102189598,102191831,102180282,102188823,102176670,102172049,102178331,108635093,102168637,102178200,102172470,102178168,102174608,102179779,102189681,108634456,102178640,102174710,102170574…
GO:0007154	cell communication	biological_process	0.96583	37	287	3696	20542	102169875,102171485,108635388,102172234,102185756,102189774,102183601,102172616,102180611,102181032,102170196,102183648,106502258,102190639,102171008,102182917,102185858,102178363,102187357,102172514,102184810,102186276,102172235,102168474,102183492,102186367,102169746,102175750,102187814,102188484,108637121,102169933,102184845,102185438,106502639,102191474,102187396
GO:0008033	tRNA processing	biological_process	0.96661	1	287	227	20542	102174830
GO:0016791	phosphatase activity	molecular_function	0.96867	2	287	353	20542	102176431,102180885
GO:0050789	regulation of biological process	biological_process	0.96873	69	287	6095	20542	102187922,102181755,102190639,102188324,102183492,102172653,102169746,102186367,102176620,102172235,102191313,102184810,100861358,102185858,102179804,108637147,108637121,102172910,102188484,102188823,102191831,102184374,102191474,102169933,102185438,102184982,102178163,102181384,102189774,108635388,102172616,102183648,102169433,102182917,102171008,102178640,106502258,102170846,102168474,102171391…
GO:0016740	transferase activity	molecular_function	0.9693	33	287	2950	20542	102180619,102171485,102179919,102177453,102171047,102183790,102181452,102178331,102180994,102181899,102180081,102172052,108637349,102178496,102171867,102174310,102184810,102179779,102180522,102169746,100861310,102185895,102187196,100861158,102189772,102178861,102184414,102191317,102168734,102180282,102179804,102188484,102168282
GO:0005525	GTP binding	molecular_function	0.96947	4	287	583	20542	102187396,102189849,102187814,102171985
GO:0050794	regulation of cellular process	biological_process	0.97049	67	287	5965	20542	102172287,102184845,102171985,102173343,102187396,106502639,102187814,102175750,102190936,102174369,102172514,102186276,102187357,102178363,102179779,102168474,102171391,106502258,102178640,102171008,102170846,102182917,102171047,102181032,102180611,102170196,102183601,106502661,102173992,102170213,102171485,102169875,102185756,102172234,102173685,102189594,102185438,102169933,102191474,102191831…
GO:0032561	guanyl ribonucleotide binding	molecular_function	0.97057	4	287	587	20542	102171985,102189849,102187814,102187396
GO:0006259	DNA metabolic process	biological_process	0.97142	10	287	1126	20542	102189894,102189849,102172879,102184810,102183790,102174369,102175908,102175861,102180081,102172855
GO:0004175	endopeptidase activity	molecular_function	0.97142	6	287	770	20542	102176878,102173343,102172616,108633175,102171391,102180048
GO:0019001	guanyl nucleotide binding	molecular_function	0.97171	4	287	591	20542	102189849,102187814,102171985,102187396
GO:0006974	cellular response to DNA damage stimulus	biological_process	0.97178	4	287	578	20542	102189849,102183790,102189894,102175908
GO:0003824	catalytic activity	molecular_function	0.97226	97	287	7654	20542	100861158,102180788,102176431,102190985,102187922,102185895,102187196,102189229,102190639,102182852,102185641,102169746,102183492,102185858,102191313,102184810,102174310,102182991,102188484,102168282,102175908,102179804,102191831,102180282,102188823,102168734,102187147,102187982,102184374,102184272,102189772,102171917,102180885,102179682,102169786,102172470,108634151,102178200,102172616,102171867…
GO:0044446	intracellular organelle part	cellular_component	0.97318	18	287	1854	20542	102191313,106502661,102173992,102185858,102169825,102185309,102171391,102176043,102170574,102178163,102169433,102180611,102179863,102188188,102191831,102171867,102172616,102175861
GO:0006950	response to stress	biological_process	0.9757	10	287	1183	20542	102179783,102172616,102175908,102171106,102171670,102189849,102184810,102170793,102183790,102189894
GO:0004842	ubiquitin-protein transferase activity	molecular_function	0.97571	1	287	245	20542	102171867
GO:0019787	ubiquitin-like protein transferase activity	molecular_function	0.97571	1	287	245	20542	102171867
GO:0044422	organelle part	cellular_component	0.97672	18	287	1876	20542	102178163,102170574,102176043,102171391,102185309,102169825,102185858,102173992,102191313,106502661,102175861,102171867,102172616,102191831,102188188,102179863,102180611,102169433
GO:0051704	multi-organism process	biological_process	0.97692	12	287	1341	20542	102172616,102170735,102174835,102172470,102178936,102187396,102173992,102181244,106502552,102170793,102182979,102186164
GO:0016746	transferase activity, transferring acyl groups	molecular_function	0.97745	1	287	252	20542	102168734
GO:0033554	cellular response to stress	biological_process	0.98135	4	287	619	20542	102189894,102175908,102189849,102183790
GO:0016787	hydrolase activity	molecular_function	0.98286	39	287	3530	20542	102171917,108633175,102180885,106502661,102169786,102176878,102174830,102180081,102172616,102172470,108637182,102171645,102168955,102190639,102189229,102187922,102190985,102185895,102176431,102184810,102191313,102179779,102183492,102180048,102171391,102187814,102188128,102188823,102186316,102172881,102175908,102189849,102171405,102172287,102184374,102173343,102181634,102187396,102187147
GO:0051716	cellular response to stimulus	biological_process	0.98318	41	287	4135	20542	102187396,102191474,106502639,102189849,102184845,102185438,102169933,108637121,102188484,102175908,102187814,102175750,102186367,102169746,102183492,102168474,102172235,102172514,102184810,102186276,102178363,102187357,102185858,102182917,106502258,102190639,102171008,102170196,102183648,102189894,102181032,102180611,102183790,102172616,102183601,102189774,102185756,102172234,108635388,102171485…
GO:0005102	receptor binding	molecular_function	0.98335	5	287	776	20542	108637113,108635007,102179779,100860957,102181610
GO:0050896	response to stimulus	biological_process	0.98392	51	287	4943	20542	108636774,102184810,102186276,102172514,102185858,102187357,102178363,102183492,102169746,102186367,102191098,102172235,102168474,102173394,102190639,106502258,102171008,102182917,102171670,102189849,102169933,102184845,102185438,102187396,106502639,102191474,102175750,102187814,102175908,108637121,102188484,102171485,108635388,102169875,102189356,102185756,102189774,102172234,108635007,102171106…
GO:0044427	chromosomal part	cellular_component	0.98631	1	287	294	20542	102175861
GO:0008168	methyltransferase activity	molecular_function	0.98647	1	287	293	20542	102187196
GO:0044764	multi-organism cellular process	biological_process	0.98673	4	287	655	20542	102172470,102186164,102170793,102173992
GO:0003924	GTPase activity	molecular_function	0.98678	2	287	430	20542	102187396,102187814
GO:0004930	G-protein coupled receptor activity	molecular_function	0.9868	12	287	1864	20542	102185895,108637121,102183601,106502258,102175750,102186367,102168474,106502639,108635388,102172514,102180611,102187357
GO:0043234	protein complex	cellular_component	0.98749	20	287	2143	20542	102170574,102178163,102176043,102168606,102185858,102173962,108636774,102173992,102191313,102171391,102176620,102172653,102189356,102188188,102175861,102172616,102171867,102169858,102169433,102180611
GO:0005654	nucleoplasm	cellular_component	0.98859	1	287	308	20542	102170574
GO:0044451	nucleoplasm part	cellular_component	0.98859	1	287	308	20542	102170574
GO:0031981	nuclear lumen	cellular_component	0.98998	2	287	453	20542	102170574,102175861
GO:0034470	ncRNA processing	biological_process	0.99002	1	287	307	20542	102174830
GO:0044723	single-organism carbohydrate metabolic process	biological_process	0.9903	1	287	314	20542	100861310
GO:0016021	integral component of membrane	cellular_component	0.99061	39	287	4076	20542	102183601,102172616,102179783,102181899,102168637,102180611,102185302,102173760,102188610,102178163,108635388,106502661,102175861,108637121,102169858,102187638,102188823,102174750,102188188,102175750,106502639,102179863,102187396,102175177,102170261,102174895,102185895,106502258,102191098,102168474,102177498,102186367,102169825,102177558,102185858,102187357,102180661,102182991,102172514
GO:0016032	viral process	biological_process	0.99108	3	287	582	20542	102170793,102173992,102186164
GO:0044425	membrane part	cellular_component	0.99113	47	287	4707	20542	102186367,102169825,102177558,102177498,102191098,102168474,102171391,102172514,102191313,102180661,108636774,102182991,102187357,102185858,102173962,102177296,102185895,102168606,106502258,102187396,102175177,102179863,106502639,102174895,102170261,102187638,102169858,102175861,108637121,102174750,102188188,102175750,102188823,102189356,106502661,108635388,102173992,102173760,102188610,102178163…
GO:0031224	intrinsic component of membrane	cellular_component	0.99181	39	287	4099	20542	102183601,102172616,102181899,102179783,102168637,102185302,102180611,102188610,102173760,102178163,106502661,108635388,102175861,108637121,102187638,102169858,102188823,102174750,102188188,102175750,102179863,106502639,102175177,102187396,102174895,102170261,102185895,106502258,102191098,102168474,102186367,102169825,102177558,102177498,102187357,102185858,102172514,102180661,102182991
GO:0043233	organelle lumen	cellular_component	0.99238	2	287	475	20542	102170574,102175861
GO:0070013	intracellular organelle lumen	cellular_component	0.99238	2	287	475	20542	102170574,102175861
GO:0004888	transmembrane signaling receptor activity	molecular_function	0.9924	13	287	2019	20542	102183601,108637121,102185895,102175750,106502258,106502639,102168474,102179313,102186367,102187357,102180611,102172514,108635388
GO:0031974	membrane-enclosed lumen	cellular_component	0.99287	2	287	480	20542	102170574,102175861
GO:0005694	chromosome	cellular_component	0.99294	1	287	337	20542	102175861
GO:0019058	viral life cycle	biological_process	0.99383	1	287	346	20542	102173992
GO:0044403	symbiosis, encompassing mutualism through parasitism	biological_process	0.99458	3	287	622	20542	102186164,102170793,102173992
GO:0044419	interspecies interaction between organisms	biological_process	0.99485	3	287	626	20542	102186164,102170793,102173992
GO:0008270	zinc ion binding	molecular_function	0.99504	14	287	1686	20542	102182887,102187922,102179804,102171867,102171989,102189594,102183434,102189849,102185438,102168637,102174296,102170196,102183648,102180048
GO:0007186	G-protein coupled receptor signaling pathway	biological_process	0.99514	13	287	2087	20542	102175750,102187814,106502258,102183601,108637121,102180611,102171485,108635388,102172514,102187357,102186367,102168474,106502639
GO:0038023	signaling receptor activity	molecular_function	0.99521	13	287	2074	20542	102180611,108635388,102172514,102187357,102186367,106502639,102168474,102179313,102175750,106502258,102185895,102183601,108637121
GO:0004872	receptor activity	molecular_function	0.99558	14	287	2169	20542	102168474,106502639,102179313,102186367,102187357,102180611,102172514,108635388,102183601,102177694,108637121,102185895,102175750,106502258
GO:0004871	signal transducer activity	molecular_function	0.99646	15	287	2298	20542	102185895,108637121,102183601,102187814,106502258,102175750,102186367,102179313,106502639,102168474,108635388,102184810,102172514,102180611,102187357
GO:0060089	molecular transducer activity	molecular_function	0.99676	16	287	2393	20542	102185895,102177694,106502258,102186367,102179313,102168474,102172514,108635388,102184810,102187357,108637121,102183601,102187814,102175750,106502639,102180611
GO:0044428	nuclear part	cellular_component	0.99712	3	287	671	20542	102175861,102171867,102170574
GO:0005975	carbohydrate metabolic process	biological_process	0.99806	2	287	574	20542	100861310,102188128
